# Supplementary material for: A receptor required for chitin perception facilitates arbuscular mycorrhizal associations and distinguishes root symbiosis from immunity
Source: PubMed Central journal article supplement (PMC11037463; doi:10.1016/j.cub.2024.03.015), 2024-04-22
Supplement: mmc2.pdf [file mmc2.pdf]

# Current Biology

## A receptor required for chitin perception facilitates arbuscular mycorrhizal associations and distinguishes root symbiosis from immunity

### Graphical abstract

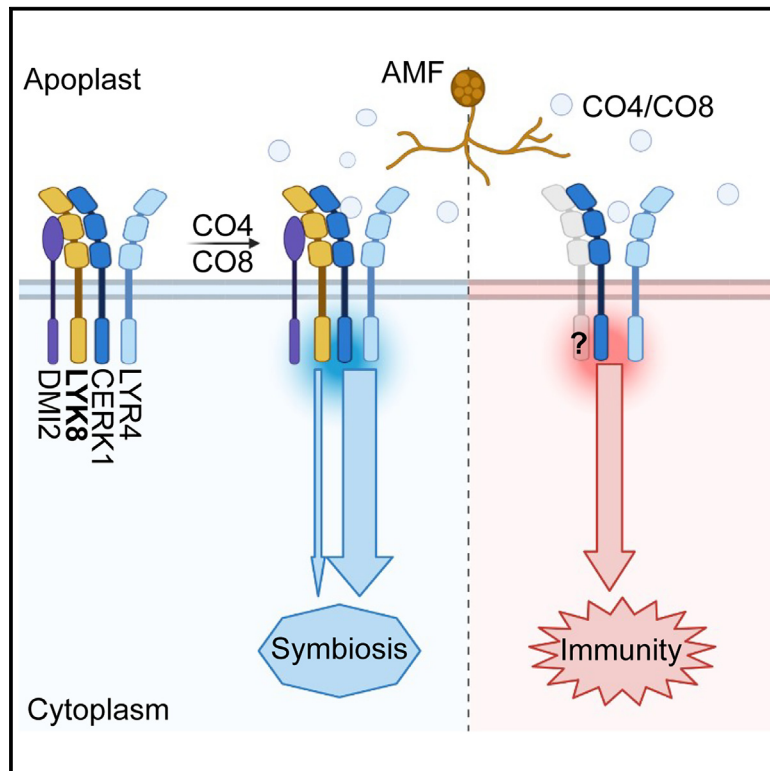

### Authors

Jingyi Zhang, Jongho Sun, Chai Hao Chiu, ..., Benoit Lefebvre, Giles E.D. Oldroyd, Feng Feng

### Correspondence

gedo2@cam.ac.uk (G.E.D.O.), feng.feng@okstate.edu (F.F.)

### In brief

The establishment of arbuscular mycorrhizal fungi (AMF) symbiosis necessitates the recognition of fungal signals by plant receptors. Zhang et al. discover a LysM receptor that is functionally redundant with CERK1 for perceiving chitin produced by AMF, thereby specifically activating symbiosis signaling and enhancing AMF colonization.

### Highlights

- *Medicago* LYK8 is functionally redundant with CERK1 for mycorrhizal fungi symbiosis
- LYK8 cannot bind to chitin but is involved in chitin-mediated symbiosis signaling
- LYK8 is not required for chitin-induced plant immunity
- LYK8 forms a receptor complex with CERK1 and DMI2 to activate symbiosis signaling

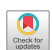

## Article

# A receptor required for chitin perception facilitates arbuscular mycorrhizal associations and distinguishes root symbiosis from immunity

Jingyi Zhang,<sup>1</sup> Jongho Sun,<sup>2</sup> Chai Hao Chiu,<sup>2</sup> David Landry,<sup>3</sup> Kangping Li,<sup>1</sup> Jiangqi Wen,<sup>4,5</sup> Kirankumar S. Mysore,<sup>1,4</sup> Sébastien Fort,<sup>6</sup> Benoit Lefebvre,<sup>3</sup> Giles E.D. Oldroyd,<sup>2,\*</sup> and Feng Feng<sup>1,7,8,\*</sup>

<sup>1</sup>Department of Biochemistry and Molecular Biology, Oklahoma State University, Stillwater, OK 74078, USA

<sup>2</sup>Crop Science Centre, Department of Plant Sciences, University of Cambridge, Cambridge CB3 0LE, UK

<sup>3</sup>Laboratory of Plant-Microbe-Environment Interactions (LIPME), Université de Toulouse, INRAE, CNRS, Castanet-Tolosan 31326, France

<sup>4</sup>Institute for Agricultural Biosciences, Oklahoma State University, Ardmore, OK 73401, USA

<sup>5</sup>Department of Plant and Soil Sciences, Oklahoma State University, Stillwater, OK 74078, USA

<sup>6</sup>Université de Grenoble Alpes, CNRS, CERMAV, 38000 Grenoble, France

<sup>7</sup>X (formerly Twitter): @FengFen09193644

<sup>8</sup>Lead contact

\*Correspondence: [gedo2@cam.ac.uk](mailto:gedo2@cam.ac.uk) (G.E.D.O.), [feng.feng@okstate.edu](mailto:feng.feng@okstate.edu) (F.F.)

<https://doi.org/10.1016/j.cub.2024.03.015>

## SUMMARY

Plants establish symbiotic associations with arbuscular mycorrhizal fungi (AMF) to facilitate nutrient uptake, particularly in nutrient-limited conditions. This partnership is rooted in the plant's ability to recognize fungal signaling molecules, such as chitooligosaccharides (chitin) and lipo-chitooligosaccharides. In the legume *Medicago truncatula*, chitooligosaccharides trigger both symbiotic and immune responses via the same lysin-motif-receptor-like kinases (LysM-RLKs), notably CERK1 and LYR4. The nature of plant-fungal engagement is opposite according to the outcomes of immunity or symbiosis signaling, and as such, discrimination is necessary, which is challenged by the dual roles of *CERK1/LYR4* in both processes. Here, we describe a LysM-RLK, *LYK8*, that is functionally redundant with *CERK1* for mycorrhizal colonization but is not involved in chitooligosaccharides-induced immunity. Genetic mutation of both *LYK8* and *CERK1* blocks chitooligosaccharides-triggered symbiosis signaling, as well as mycorrhizal colonization, but shows no further impact on immunity signaling triggered by chitooligosaccharides, compared with the mutation of *CERK1* alone. *LYK8* interacts with *CERK1* and forms a receptor complex that appears essential for chitooligosaccharides activation of symbiosis signaling, with the *lyk8/cerk1* double mutant recapitulating the impact of mutations in the symbiosis signaling pathway. We conclude that this novel receptor complex allows chitooligosaccharides activation specifically of symbiosis signaling and helps the plant to differentiate between activation of these opposing signaling processes.

## INTRODUCTION

The majority of terrestrial plant species can establish a symbiotic relationship with arbuscular mycorrhizal fungi (AMF) to enhance nutrient uptake.<sup>1,2</sup> This symbiosis boosts plant growth and plays a pivotal role in the regulation of the global terrestrial biogeochemical cycles.<sup>3</sup> For this relationship to be established, plants must recognize AMF through the activation of a conserved symbiosis signaling pathway.<sup>1,4</sup> This activation occurs through the perception of fungal signaling molecules, known as “Myc Factors.”<sup>5</sup> Myc factors comprise chitooligosaccharides (Myc-COs) from fungal cell walls,<sup>6,7</sup> which are oligomers of *N*-acetyl glucosamine, and lipo-chitooligosaccharides (Myc-LCOs) secreted by AMF.<sup>8</sup> Myc-LCO is distinguished by substitutions on the nonreducing end of the molecule of *N*-acyl moieties and by additional decorations onto this basic backbone.<sup>8</sup> These LCOs are structurally similar to the nodulation factors (NFs) generated by symbiotic

nitrogen-fixing rhizobium bacteria.<sup>8</sup> Upon CO/LCO perception, symbiosis signaling is activated through nuclear calcium oscillations and resultant symbiotic gene expression to facilitate AMF infection.<sup>4</sup> Additionally, co-inoculation of CO and AMF promotes strigolactone biosynthesis, stimulating intracellular accommodation and arbuscule development of AMF in plant roots.<sup>9</sup>

Studies in various plant species have demonstrated that plant lysin-motif receptor-like kinases (LysM-RLKs) play a central role in recognizing CO and LCO molecules.<sup>10–14</sup> In the legume *Medicago truncatula* (*M. truncatula*), CO oligomers ranging from 4 to 8 units can activate symbiosis signaling.<sup>6,7,15</sup> Receptors required for this process include two LysM-RLKs, *MtCERK1* (hereafter designated as *CERK1*) and *MtLYR4* (hereafter *LYR4*).<sup>7,16</sup> Both receptors function in the CO-activation of nuclear calcium oscillations and resultant transcriptional upregulation of symbiotic gene expression, upon treatments with either CO4 (*N*-acetyl chitotetraose) or CO8 (*N*-acetyl chitooctaose).<sup>7</sup> *cerk1* displays a

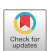

significant reduction in AMF colonization, highlighting a role for CO signaling in arbuscular mycorrhizal symbiosis (AMS).<sup>7,16</sup> This has been similarly observed in other species where *CERK1* orthologs have been mutated, such as rice (*Oryza sativa*), pea (*Pisum sativum*), banana (*Musa spp.*), and *Parasponia andersonii* (*P. andersonii*).<sup>17–23</sup> Besides CO, AMF also produce LCO,<sup>8</sup> and several LysM-RLKs have been shown to bind LCO in legumes<sup>24–30</sup> and act as pivotal components for LCO detection in the root nodule symbiosis (RNS), notably *MtNFP/LjNFR5* and *MtLYK3/LjNFR1* in legumes *M. truncatula* and *Lotus japonicus*.<sup>31–37</sup> These LCO receptors, which are essential for the RNS, also contribute to the AMS, as evidenced by a quantitative reduction in AMF colonization in the *cerk1/nfp* double mutant, as compared with *cerk1* alone.<sup>7</sup> Furthermore, *NFP* orthologs in tomato (*Solanum lycopersicum*), *Petunia hybrida*, and barley (*Hordeum vulgare*) contribute to AMF colonization,<sup>38–41</sup> although, at least in barley, the function of *NFP* homologs is not limited to LCO signaling alone, as they also contribute to CO signaling.<sup>41</sup> Unlike the case for the RNS, for AMF infection, no mutation in a single LysM-RLK, in any species, leads to almost complete abolishment of AMF colonization,<sup>7,29,42,43</sup> suggesting the presence of additional unknown receptors involved in AMF induction of symbiosis signaling.

Besides their role as symbiotic signals, COs also act as microbe-associated molecular patterns (MAMPs), triggering plant immune responses, such as the generation of reactive oxygen species (ROS), mitogen-activated protein kinase (MAPK) phosphorylation, and initiation of defense gene expression.<sup>2,14,44,45</sup> Recognition of CO8, and to a lesser extent CO4, activates defense responses in various plant species, and this requires *CERK1* and *LYR4* in *M. truncatula*.<sup>7,45</sup> Activation of both immunity and symbiosis signaling through the same receptors<sup>7,16,18–21</sup> suggests that plants might not be able to differentiate AMF from pathogenic fungi, solely through CO recognition.<sup>7</sup> To establish a successful infection in plant roots, AMF can suppress plant immunity through LCO, short-chain CO, or secreted effectors and proteins.<sup>7,40,46–49</sup> However, how plants discriminate between the activation of immunity and symbiosis signaling remains unknown.

*CERK1* is classified within the LYK subfamily of LysM-RLKs with potentially active kinase domains.<sup>11</sup> This LYK family has 11 members (*MtLYK1–MtLYK11*; *CERK1* is *MtLYK9*)<sup>11</sup> in *M. truncatula*, which is greater than the equivalent in the non-symbiotic plant species *Arabidopsis thaliana* (*A. thaliana*). This expansion may suggest an evolutionary adaptation for engaging in symbiotic microbe associations. In *M. truncatula*, *CERK1* is the major receptor mediating AMF recognition and symbiosis, but its mutant phenotype suggests functional redundancy with other receptors that still allow some level of AMF colonization.<sup>7,16</sup> In this study, we identified a further LysM-RLK in the *CERK1* family, *MtLYK8* (*LYK8* hereafter), which exhibits functional redundancy with *CERK1* in the AMS but plays no role in CO-activated plant immunity. We demonstrate the dominance of CO signaling in AMS and show how *LYK8* differentiates between CO-activation of symbiosis and immunity signaling.

## RESULTS

### **LYK8 is functionally redundant with CERK1 for AMF colonization**

To uncover LysM-RLKs in the LYK family that might participate in AMS, we obtained *Tnt1* insertion mutant lines for several LysM-

RLK genes,<sup>11,50</sup> including *MtLYK6*, *MtLYK7*, *MtLYK8*, and *MtLYK10* in *M. truncatula*. The homozygous mutant alleles were validated for the absence of detectable transcripts using semi-quantitative reverse transcription polymerase chain reaction, and they were designated as *lyk6*, *lyk7*, *lyk8* (*lyk8-1* and *lyk8-2*; two mutant alleles with insertions in different domains of LYK8), and *lyk10*, respectively (Figures S1A–S1C). Subsequently, wild-type and mutant plant roots were inoculated with *Rhizophagus irregularis* (*R. irregularis*) spores to assess fungal colonization. As a control, the *cerk1* mutant displayed significantly reduced fungal infection and colonization, consistent with prior observations<sup>7,16</sup> (Figures 1A, 1B, S1D, and S1E). The mutations of *LYK6*, *LYK7*, *LYK8*, and *LYK10*, individually, appeared to have no effect on total AMF colonization and fungal infection (Figures 1A, 1B, S1D, and S1E). To investigate whether these LysM-RLKs function redundantly with *CERK1* for AMS, we genetically crossed *cerk1* with the new receptor mutants, producing several double-mutant lines. Surprisingly, when inoculated with a low concentration of spores, *lyk8-1/cerk1* (*lyk8/cerk1* hereafter) roots exhibited a complete loss of arbuscules, intercellular hyphae, and vesicles, while infection events in *lyk6/cerk1*, *lyk7/cerk1*, and *lyk10/cerk1* were comparable to those in *cerk1* alone (Figures 1A–1C, S1D, and S1E). Higher doses of AMF inoculum led to higher levels of hyphopodium development on the root surface of *lyk8/cerk1* than on the root surface of wild-type plants, but the fungal hyphae did not penetrate the rhizodermis to form arbuscules in the mutant (Figures 1C and S2A). This deficiency in fungal colonization persisted, even extending to 7 weeks post inoculation (Figure S2C). Additionally, co-cultivation of wild-type nurse plants with *lyk8/cerk1* increased the number of hyphopodia development in the mutant but failed to restore AMF infection and arbuscule development (Figures S2A and 2B). Altogether, this demonstrates the persistent lack of fungal infection, even with increased inoculum strength and extended inoculation time.

To confirm that the mutation of *LYK8* in the *cerk1* background hinders fungal colonization, we undertook a genetic complementation of the *lyk8/cerk1* mutant using the coding sequences of *LYK8* and *CERK1*. We introduced both genes in a single construct, driven by their native promoters, into *lyk8/cerk1* roots via *Agrobacterium rhizogenes*-mediated hairy root transformation. Successful transformation resulted in complete restoration of fungal infection and colonization (Figures 1D and 1E), accompanied by 100% complementary events in ten individual transgenic roots in which the expression of *LYK8* and *CERK1* proteins were detected in the roots (Figure 1F). These data reveal that *LYK8* is redundant with *CERK1* in AMS. In the single *lyk8* mutant, the signaling function is fulfilled by the major receptor *CERK1*, resulting in fungal colonization similar to that of the wild-type plant (Figures 1A–1C).

To determine whether the *lyk8/cerk1* mutant is specifically deficient in symbiosis with *R. irregularis* or impacts root symbiosis with other AMF as well, we inoculated wild-type and *lyk8/cerk1* mutant plants with *Gigaspora margarita* (*G. margarita*), which is phylogenetically distant from the model *R. irregularis*. 3 weeks post inoculation, only hyphopodia were observed, with a complete absence of arbuscules in the cortical cells of the *lyk8/cerk1* mutant (Figures 1G and 1H). This finding further supports the critical role of *LYK8* and *CERK1* in facilitating symbiotic relationships between plant roots and various AMF species.

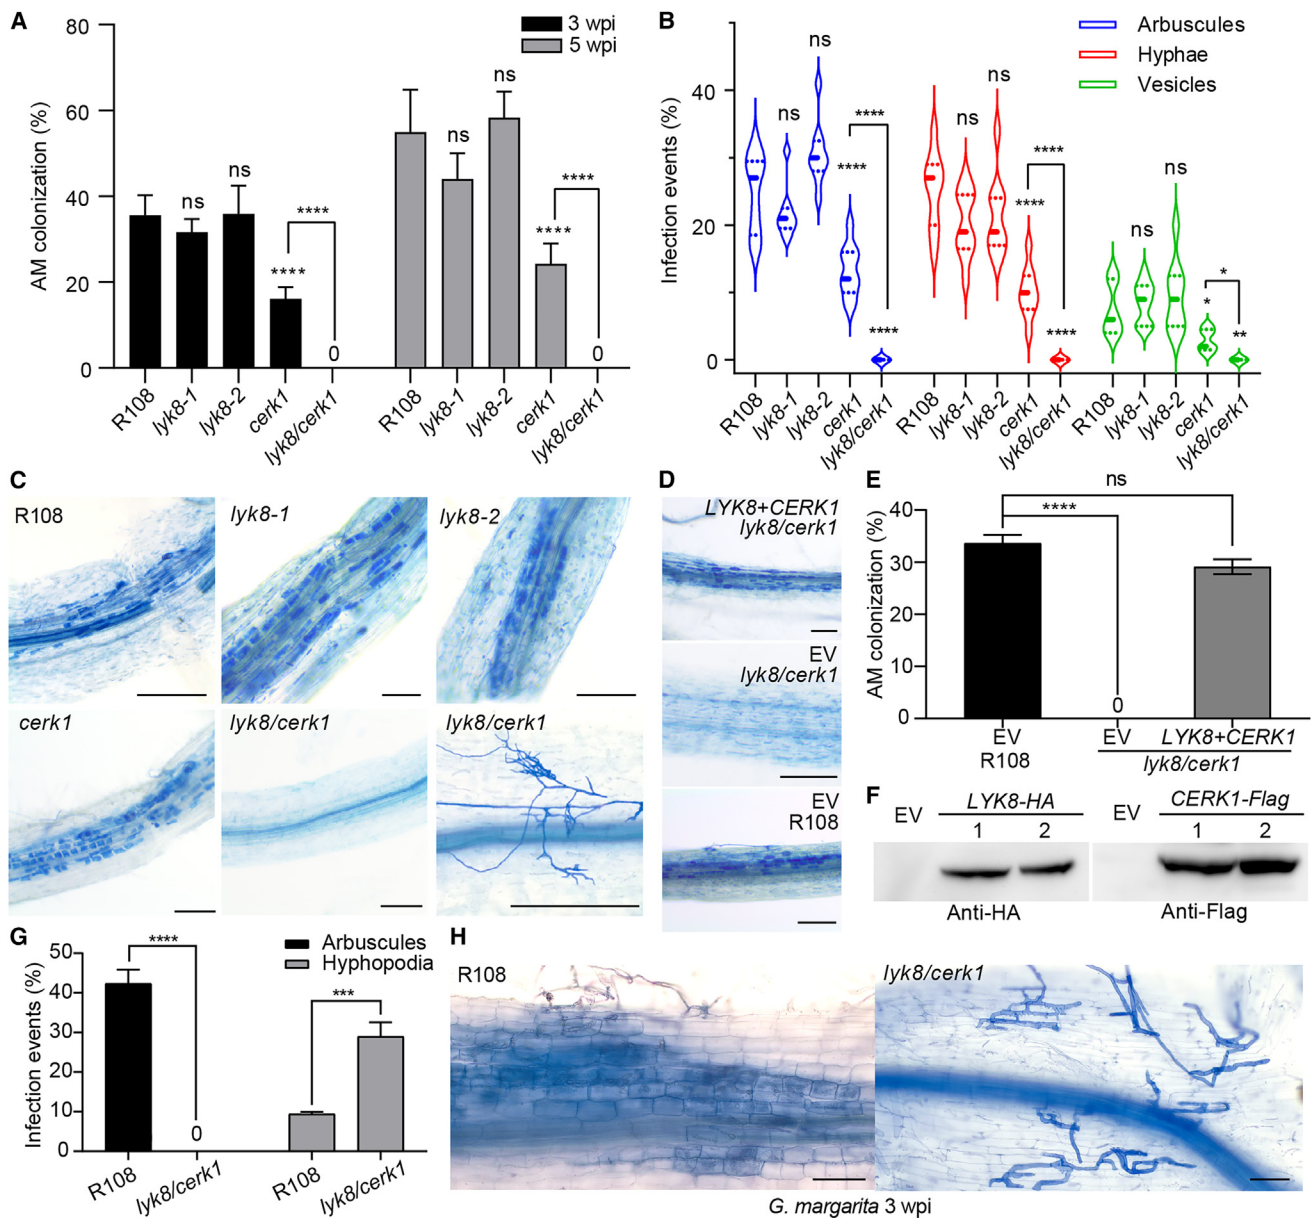

**Figure 1. *lyk8/cerk1* double mutant exhibited no AMF colonization**

(A) Colonization of *R. irregularis* is represented as the percentage of root length colonization, performed at 3 and 5 weeks post inoculation (wpi).  
 (B) Violin plot illustrates infection events quantified at 3 wpi. This experiment was repeated three times with similar results.  
 (C) Images of *R. irregularis* inoculated roots stained with ink. The hyphopodia (bottom right image) was observed in the roots of 5 wpi of high concentration of fungal spores. Scale bars, 150  $\mu$ m.  
 (D and E) AMF colonization and corresponding images from a complementation experiment in *lyk8/cerk1* double mutant by hairy root transformation. The empty vector (EV) was transferred as a control. Scale bars, 150  $\mu$ m.  
 (F) The expression levels of *LYK8* and *CERK1* in the complementation roots were detected by western blot. Results from two individual transgenic roots are shown.  
 (G) Arbuscules and hyphopodia were quantified in plants inoculated with *G. margarita* at 3 wpi. Statistically significant differences were determined using Student's t test (mean  $\pm$  SEM, n = 10).  
 (H) Images show the ink-stained colonization of *G. margarita* in plant roots. Scale bars, 100  $\mu$ m.  
 (A, B, and E) Asterisks denote statistical significance as calculated by one-way ANOVA and Tukey's multiple comparison (mean  $\pm$  SEM, n = 10). See also Figures S1–S3.

AMS and RNS share the common symbiosis signaling pathway.<sup>4</sup> To examine whether *LYK8* and *CERK1* play a role in the recognition of rhizobia, we inoculated *Ensifer melloti* Em1021 on wild-type and

mutant roots. We observed that mutation neither in *LYK8* alone nor in conjunction with *CERK1* impaired nodulation, suggesting their specific relevance in the AMS (Figure S2D).



Studies have shown that AMF can induce lateral root primordia formation and increase lateral root densities in a *CERK1*-dependent manner in diverse plant species, including *M. truncatula*.<sup>51</sup> To investigate whether *LYK8* also plays a role in root development in response to AMF, we assessed the root architecture response of wild-type and receptor mutant plants. Interestingly, both *lyk8* and *cerk1* plants exhibited an increase in first-order lateral root numbers in the absence of AMF inoculation, suggesting their potential involvement in lateral root development (Figure S2G). However, *LYK8* appears to have no role in the regulation of primary root growth (Figure S2H). Notably, the promotion of lateral root number by AMF was absent in *lyk8* plants, similar to the observations in *cerk1* and *lyk8/cerk1* mutants (Figure S2G), highlighting that *LYK8* and *CERK1* are both essential for AMF-induced root responses and do not play redundant roles. This indicates that these two receptors might form a receptor complex for the perception of AMF-produced signal molecules, thereby regulating root development.

To understand how *CERK1* and *LYK8* occupy overlapping signaling functions in the AMS, we examined their promoter activity during AMF infection. Both *LYK8* and *CERK1* exhibited similar expression patterns in root tissues, as evidenced by promoter  $\beta$ -glucuronidase (GUS) assays and wheat germ agglutinin (WGA) staining (Figures S3A–S3H). Without *R. irregularis* inoculation, the promoters of both *LYK8* and *CERK1* were expressed throughout various root cell layers (Figures S3A and S3B). These expression patterns were maintained during the early stages of AMF infection, including hyphopodium formation (Figures S3C and S3D) and the extension of intraradical hyphae into the root cells (Figures S3E and S3F). Interestingly, fungal colonization slightly increased receptor expression in arbuscule-containing cells (Figures S3G and S3H), consistent with the observations found in the *Medicago* gene expression database,<sup>47</sup> suggesting a modality of positive feedback colonization in root cells and receptor expression. However, neither *LYK8* nor *CERK1* alone are required for arbuscule development<sup>7</sup> (Figure S1F). Quantitative real-time polymerase chain reaction (real-time qPCR) revealed an induction of *LYK8* expression post fungal root colonization (Figure S4A) that is likely the result of *LYK8* transcriptional induction by CO and LCO (Figure S4B). Taken together, these findings demonstrate that *LYK8* functions synergistically with *CERK1* in AMF colonization and that these two receptors show very similar expression patterns.

### **LYK8 cannot bind to CO but is involved in CO-mediated symbiosis signaling**

The essential role of *LYK8* and *CERK1* in fungal infection implies that similar to *CERK1*, *LYK8* may participate in early symbiosis signaling initiated by symbiotic elicitors. To test this, we evaluated CO- and LCO-triggered gene expression of symbiotic marker genes<sup>7</sup> in *lyk8-1*, *lyk8-2*, *cerk1*, and *lyk8/cerk1* mutants. We found that wild-type plants exhibited CO4- and CO8-driven induction of symbiotic genes, with this induction being partially dependent on *CERK1*, but independent of *LYK8* (Figures 2A, 2B, S4C, and S4D). However, the *lyk8/cerk1* showed no detectable induction of the tested genes by CO, while maintaining their induction by LCO (Figures 2A–2C, S4C, and S4D). During *R. irregularis* inoculation, the induction of *MtVapyrin*, *MtPT4*,

and *MtLYK10* was disrupted in *lyk8/cerk1* roots after 3 and 5 weeks of inoculation, in line with the colonization of this mutant (Figures 2D, S4E, and S4F). Our previous studies highlighted the combined importance of CO and LCO signaling for AMS, noting a significant reduction of AMF colonization in *cerk1/nfp* roots compared with *cerk1* alone.<sup>7</sup> Interestingly, AMF colonization and infection patterns showed no defects in *lyk8/nfp* roots, indicating the dominant role of *CERK1* in CO signaling that might compensate for the deficiency of *lyk8/nfp* in AMF colonization (Figures S2E and S2F). Collectively, our findings demonstrate that *LYK8* and *CERK1* have overlapping roles in modulating CO-triggered symbiotic gene expression.

Periodic calcium oscillations in the nucleus serve as an indicator of symbiosis signaling, activated by both CO and LCO.<sup>15</sup> To delve deeper into the role of *LYK8* in CO-triggered symbiosis signaling, we analyzed calcium oscillations in the roots of wild type and receptor mutants using the calcium reporter, Yellow Cameleon YC3.6.<sup>7</sup> In line with prior research, the *cerk1* single mutant displayed a disruption in calcium oscillations in atrichoblast cells when exposed to low concentrations of CO4 and CO8<sup>7</sup> ( $10^{-8}$  M; Figures 3A and 3B). However, *cerk1* still showed a response when exposed to high concentrations of these molecules ( $10^{-5}$  M; Figures 3C and 3D), suggesting the involvement of additional receptor(s) at these concentrations of CO. In contrast to *CERK1*, the mutation of *LYK8* alone exhibited no defect in CO4- and CO8-induced nuclear calcium oscillations (Figures 3A–3D). In the *cerk1/lyk8* double mutant, we observed a complete loss of CO-induced calcium response, even at exceptionally high concentrations of CO4 and CO8 ( $10^{-4}$  M; Figures 3C, 3D, and S5). This observation underscores the redundant role of *LYK8* and *CERK1* in CO signaling. The LCO-triggered calcium response in *lyk8* and *lyk8/cerk1* mutants mirrored that of wild-type plants (Figure S5). These data, combined with the gene expression and root nodulation findings (Figures 2C and S2D), indicate that *LYK8* plays a specific role in CO, but not LCO, signaling in *M. truncatula*.

To determine whether *LYK8* functions as a CO receptor, we transiently expressed *LYK8* in *Nicotiana benthamiana* (*N. benthamiana*) leaves and assessed its ability to bind to chitin resin beads through a pull-down assay. The previously reported CO receptors, *CERK1* and *LYR4*, served as positive controls, while the LCO receptor *LYK3* served as the negative control.<sup>33,36</sup> The result demonstrated that both *LYR4* and *CERK1* possess a strong affinity for chitin beads, consistent with previous studies<sup>7</sup> (Figure 4A). *LYK8* displayed much weaker chitin binding relative to *CERK1* and *LYR4*, while no binding was evident for *LYK3* (Figure 4A). However, the weak binding observed was unable to withstand the stringent washes following the chitin bead pull-down assay (data not shown). Additionally, we employed cross-linkable biotinylated versions of CO5 (CO5-biotin) and CO7 (CO7-biotin) to evaluate *LYK8*'s binding affinity to COs. Consistent with the results from the chitin beads, neither CO5-biotin nor CO7-biotin was able to bind to *LYK8* at any concentration (Figures 4B and 4C). In contrast, as positive controls, the *M. truncatula* *MtLYR8* protein demonstrated binding ability to CO5-biotin,<sup>52</sup> and the rice *OsCEBiP* exhibited high-affinity binding ability to CO7-biotin<sup>53</sup> (Figures 4B and 4C). These data suggest that *LYK8* might not be sufficient to bind with CO and is likely to function as a co-receptor for *LYK9* and *LYR4* in the

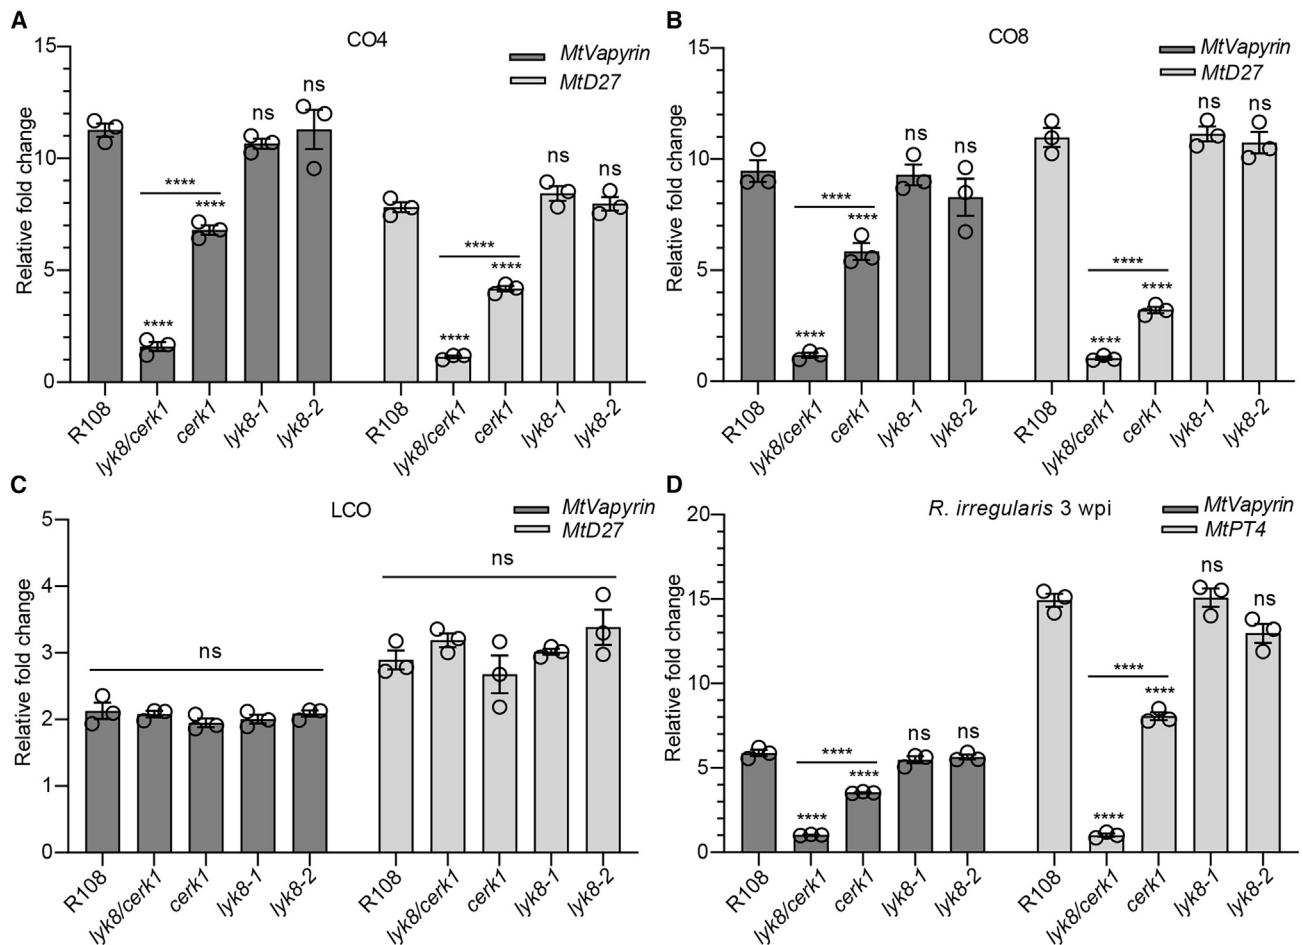

**Figure 2. *lyk8/cerk1* completely interrupted the expression of symbiotic gene induced by CO and AMF**

(A–C) Real-time qPCR analysis assessed the expression of symbiotic marker genes in the roots of both the wild type and receptor mutants following treatments with H<sub>2</sub>O, 10<sup>-8</sup> M CO4 (A), 10<sup>-8</sup> M CO8 (B), and 10<sup>-8</sup> M LCO (C) for 6 h. Relative fold change compared with individual water treatments is shown.

(D) The relative fold change represents the expression of *MtVapyrin* and *MtPT4* detected in the plant roots 3 wpi with *R. irregularis*, compared with the expression in non-inoculated roots.

(A–D) Asterisks denote statistical significance as calculated by one-way ANOVA and Tukey's multiple comparison (mean ± SEM, n = 8). These results have three independent biological replications.

See also Figure S4.

perception of CO molecules. Nevertheless, we cannot exclude the possibility of a weak binding affinity of LYK8 for COs, undetectable in the assays that we performed.

### LYK8 appears to have no role in CO-triggered plant immunity

*CERK1* is implicated in both CO8-induced plant immunity and symbiosis.<sup>7</sup> This prompted us to postulate a potential role for *LYK8* in plant immunity. To this end, we assessed early immune responses, specifically ROS production and MAPK activation, in the roots of wild type and receptor mutants following CO8 treatment. Notably, *lyk8* roots exhibited ROS response and MPK3/6 phosphorylation at levels comparable to those of the wild type (Figures 5A, 5B, S6A, and S6B). Although *cerk1* plants exhibited a modest activation of MPKs, this activation was *LYK8* independent, as shown by the similar levels of activation between *lyk8/cerk1* and *cerk1* (Figures 5B and S6B). This suggests no functional

overlap between *LYK8* and *CERK1* in CO8-triggered MAPK activation. Furthermore, through real-time qPCR analysis, we examined CO8-induced expression of defense genes such as *MtPP10*, *MtChitinase*, and *MtRbohA*.<sup>7</sup> *LYK8* is dispensable for the induction of these genes upon CO8 exposure and does not have a redundant role with *CERK1* in defense regulation (Figures 4C, 4D, and S6C). Consequently, these data indicate that *LYK8* does not act as a redundant receptor alongside *CERK1* in CO8-triggered immune signaling.

To investigate the role of *LYK8* in regulating plant disease resistance, we evaluated the susceptibility to the root fungal pathogen, *Fusarium oxysporum* (*F. oxysporum*), in both the wild type and receptor mutants. By measuring the root lesion size of the infected samples, we found that roots of *cerk1* were more susceptible to *F. oxysporum* (Figures 6A and 6B), while *lyk8* showed susceptibility similar to the wild type, and *lyk8/cerk1* exhibited susceptibility comparable to *cerk1* (Figures 6A

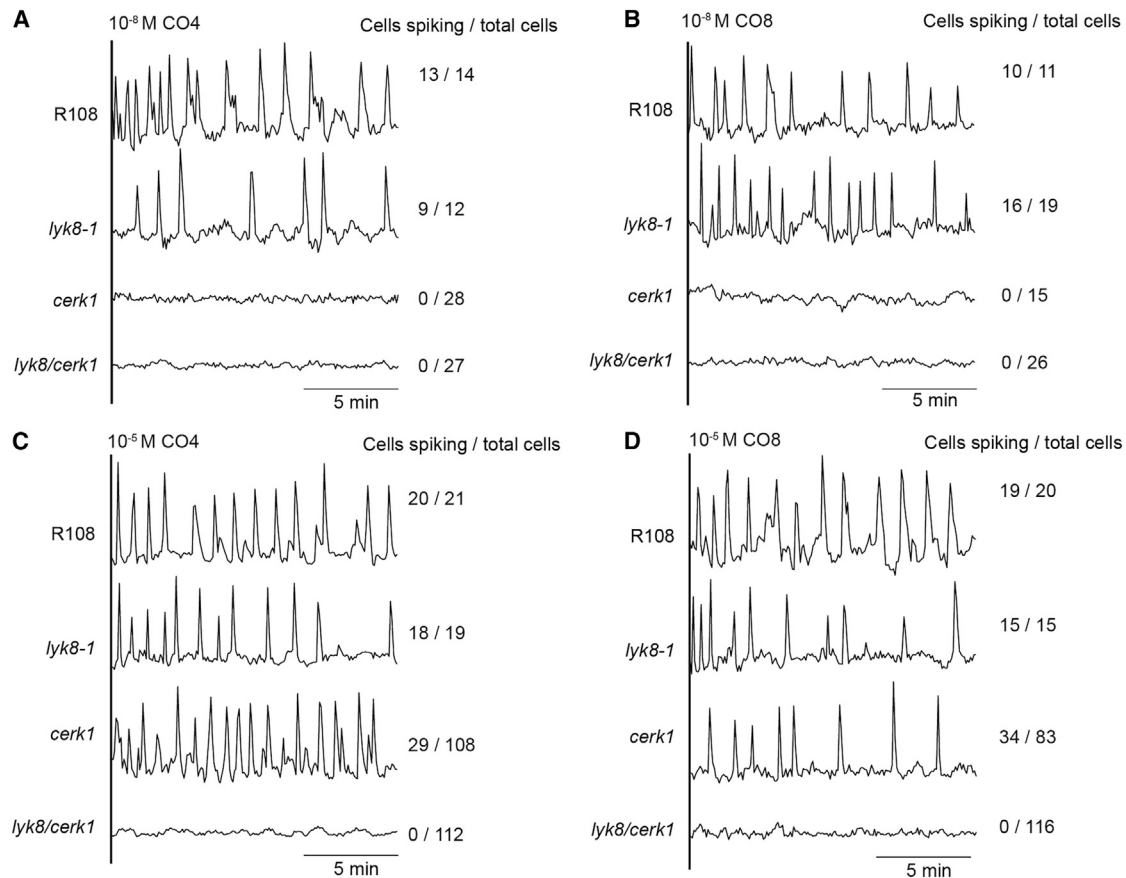

**Figure 3. CO-triggered calcium oscillations are abolished in *lyk8/cerk1***

(A–D) Representative calcium traces of *M. truncatula* atrichoblasts from lateral roots were recorded in wild type, *lyk8-1*, *cerk1*, and *lyk8/cerk1* in response to both a low concentration ( $10^{-8}$  M) of CO4 (A) and CO8 (B), as well as a high concentration ( $10^{-5}$  M) of CO4 (C) and CO8 (D). The traces denote the ratio of yellow fluorescent protein (YFP) to cyan fluorescent protein (CFP) in arbitrary units. The numbers marked on the right of the traces indicate the number of cells responding compared with the total number of cells analyzed.

See also Figure S5.

and 6B). This observation is corroborated by real-time qPCR analyses quantifying *F. oxysporum* biomass, which reflected the fungal infection trends observed in the measurement of root lesion sizes (Figure 6C). Collectively, these findings indicate that LYK8 is not involved in plant immunity.

### LYK8 forms a receptor complex with CERK1 for the activation of symbiosis signaling

We hypothesized that LYK8 might partner with the identified CO receptors to form a receptor complex pivotal for the regulation of symbiosis signaling. To test this hypothesis, we employed a bimolecular fluorescence complementation (BiFC) assay, fusing LYK8 to the N-terminal part of yellow fluorescent protein Venus and the other receptors to the C-terminal part of Venus, subsequently expressing them in *N. benthamiana*. The results showed that LYK8 associates with CERK1 and LYR4 at the plasma membrane. However, we observed no interactions between LYK8 and the leucine-rich repeat receptor-like kinases AtFLS2<sup>54</sup> and AtBRI1<sup>55</sup> from *A. thaliana* or between LYK8 and the LysM receptor-like protein MtLYM1<sup>56</sup> from *M. truncatula* (Figure 7A). Additionally, while LYK8 can interact with DMI2 on the membrane,

the fluorescence appears weak due to low expression of DMI2 in *N. benthamiana* (Figure 7A). Extending our investigation using a co-immunoprecipitation assay, we confirmed interactions between LYK8 and other receptors, namely CERK1, LYR4, and DMI2 (Figure S7A). Upon exposure to CO4 and CO8, the interactions of LYK8 with CERK1 and DMI2 were notably enhanced, while the interactions of LYK8 with LYR4 or LYK8 themselves remained unchanged (Figures 7B and S7B). This implies that the CERK1-LYK8-DMI2 receptor complex might play a pivotal role in mediating CO-triggered symbiosis signaling.

### DISCUSSION

AMF generate a range of signaling molecules, notably CO and LCO.<sup>6,8</sup> These molecules activate symbiosis signaling and eventually enable host infection. This study reveals that CO-mediated symbiosis signaling is pivotal and sufficient to explain AMF root colonization, with LYK8 working alongside CERK1 for CO recognition (Figure 7C). The expression of LYK8 is upregulated by CO, AMF, and nutrient deprivation<sup>41</sup> (Figures S4A and S4B), implying a role of LYK8 in reinforcing fungal perception, alongside

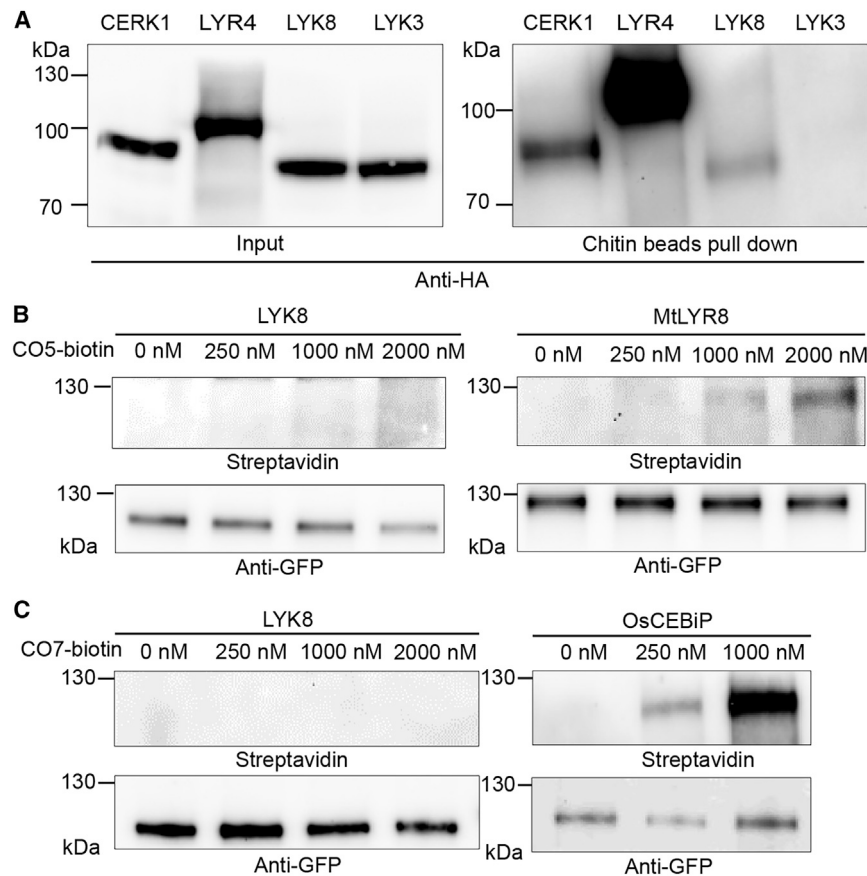

**Figure 4. LYK8 protein weakly binds to chitin beads but not to CO5 and CO7**

(A) The LYK8 protein expressed in *N. benthamiana* leaves exhibits weak binding to chitin resin beads. CERK1 and LYR4 are positive controls. LYK3, the LCO receptor, is the negative control. (B and C) Detecting the binding affinity of the LYK8 protein with CO5 and CO7. Chimeric YFP-tagged proteins were expressed in *N. benthamiana* leaves followed by incubation with CO5-biotin or CO7-biotin. The proteins were enriched using anti-GFP beads, and their presence was confirmed via western blotting with anti-GFP antibody and streptavidin. MtLYR8 served as the positive control for CO5 binding (B), and OsCEBiP was the positive control for CO7 binding (C).

constitutive *CERK1*. However, *CERK1*'s dominant role in CO signaling has overshadowed LYK8's function, making it challenging to pinpoint mutants of LysM-RLKs that completely lack AMF colonization. The enhanced expression of *LYK8* and *CERK1* in arbuscule-containing cells suggests that CO recognition also occurs in the late stage of fungal infection. This is consistent with the observation of calcium oscillations in root cortical cells coincident with the fungal colonization of the root cortex,<sup>57</sup> as well as the observation that application of CO can promote arbuscule development.<sup>9</sup> This recognition likely promotes either the interactions between LYK8/CERK1 and CKL (CYCLIN-DEPENDENT-KINASE-LIKE) proteins or the phosphorylation of CKLs by the receptors, potentially enhancing lipid provisioning to the fungus.<sup>58</sup> It seems that the role of *LYK8* in the AMS is evolutionarily conserved in dicots. For instance, in *P. andersonii*, concurrent mutations of the potential *LYK8*-orthologous gene, *PanLYK1*, and the *CERK1*-orthologous gene, *PanLYK3* (Figure S1G), lead to an absence of mature arbuscules in the cortical cells and a drastic reduction in fungal colonization.<sup>20</sup> Similarly, suppressing the *LYK8*-ortholog *SILYK12* in tomatoes severely inhibits the AMS.<sup>59</sup> However, unlike *M. truncatula*, mutants in these receptors still partially sustain fungal colonization, implying the presence of other receptors or signaling pathways for the AMS in these species.

Beyond CO signaling, we previously showed that LCO signaling plays a role in the AMS,<sup>7</sup> albeit to a lesser extent than CO signaling. AMF might leverage LCO molecules to amplify CO-mediated symbiosis signaling under specific scenarios. Supporting this, rice and barley roots respond to LCO only under nutrient-deprived

conditions.<sup>15,41</sup> Recent work indicates that LCO is not exclusive to AMF but is also synthesized by other beneficial and pathogenic fungi.<sup>60</sup> This implies that the function of LCO extends beyond simply activating symbiosis, possibly acting as a general signal for fungi.<sup>60</sup> This signal could either regulate the metabolic profile of microbes in the soil to compete across microbial kingdoms<sup>61</sup> or influence various host responses, like enhancing lateral root growth and suppressing plant immunity.<sup>7,8,15,46,48,51,62–67</sup> Importantly, our work demonstrates that abolishing CO signaling alone is sufficient to block AMF colonization, analogous to the situation observed in mutants of the symbiosis signaling pathway.<sup>5</sup> As such, we conclude that CO recognition acts as the principal factor for recognizing AMF and is sufficient to explain the activation of symbiosis signaling by AMF. Consistent with our conclusion, the application of CO in plant roots has a long-term effect through the development of AMS signaling.<sup>9</sup> We proposed that LCO must play much more subtle roles in AMF colonization, with their negative impact on immunity signaling<sup>7,46,48,62,64</sup> being one modality of action.

The differential responses of *LYK8* and *CERK1* in mediating immunity are intriguing. *CERK1* functions in both immunity and symbiosis, while *LYK8* is dedicated to CO-mediated symbiosis signaling. It remains possible that *LYK8* might also contribute to immunity, potentially masked by the overlapping functions of other LysM-RLKs in *M. truncatula*. Current findings align with the observations on *SILYK12* and *PanLYK1*, where both receptors appear to be important for AMF colonization, without direct roles in plant immunity.<sup>20,59</sup> Additionally, the *L. japonicus* receptor *EPR3a*, which can bind  $\beta$ -1,3/ $\beta$ -1,6-glucans from fungi, appears to be involved only in symbiosis and is not required for  $\beta$ -glucan-triggered plant immunity.<sup>68</sup> A recent study demonstrated that nanobody induction of the formation of a receptor complex can specifically activate symbiosis signaling.<sup>69</sup> Interestingly, CO treatments intensify interactions of LYK8 with CERK1 and DMI2, but not LYR4 (Figures 7B and S7B), hinting that receptors might form specialized complexes in the presence of CO to differentiate between immunity and symbiosis (Figure 7C). The



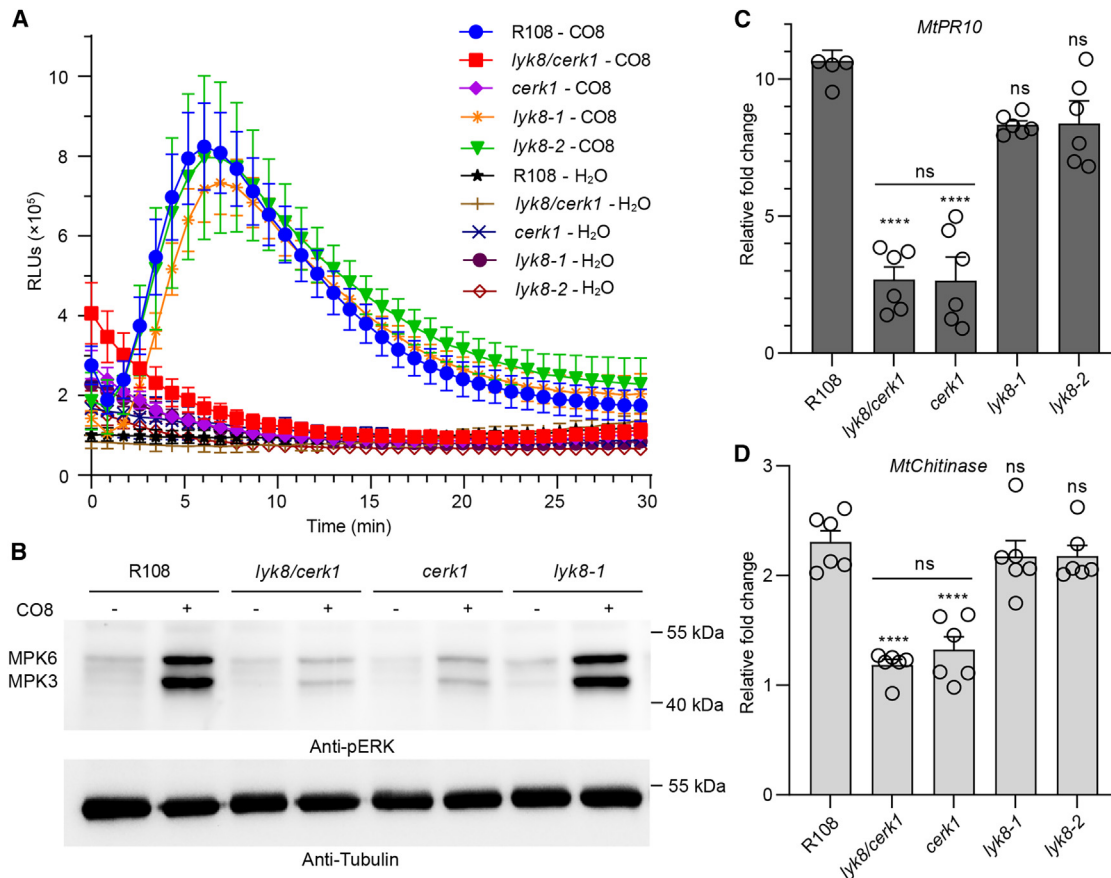

**Figure 5. LYK8 is not involved in CO8-triggered immune signaling**

(A) ROS production was measured in the roots of *M. truncatula* in response to both water and  $10^{-6}$  M CO8 (mean  $\pm$  SEM,  $n = 6$ ).

(B) The phosphorylation of MPK3 and MPK6 in plant roots was detected by the anti-pERK antibody. The Tubulin protein served as a control to ensure equal loading.

(C and D) The real-time qPCR analysis of defense marker genes *MtPR10* (C) and *MtChitinase* (D) induced by  $10^{-6}$  M CO8 in wild type and receptor mutants. The relative fold change compared with water treatment is shown. This experiment was independently replicated three times. The asterisks denote statistical significance as calculated by one-way ANOVA and Tukey's multiple comparison (mean  $\pm$  SEM,  $n = 8$ ).

See also Figure S6.

underlying mechanisms of these interactions remain an avenue for further study. Taken together, this suggests that plants might recognize identical molecules but employ different signaling routes for symbiosis and immunity, potentially due to the combination of receptors and their downstream associates.

LysM-RLKs, responsible for detecting CO and LCO, predominantly pair an active kinase from the LYK subfamily with an inactive one from the LYR subfamily.<sup>11</sup> While LYR4 is required for CO-induced symbiosis and immunity signaling, unlike CERK1, its mutation does not influence AMF colonization.<sup>7</sup> This leads us to propose that other LYR receptors might be functionally interchangeable with LYR4 for the AMS, much in the way LYK8 is for CERK1. Notably, *cerk1* and *lyk8/cerk1* roots still maintain a similarly low level of MAPK activation in response to CO8 (Figure 5B). Considering LYK8 is not involved in immunity signaling, this suggests that another LYK receptor might have functional redundancy with CERK1, specifically regulating immune signaling (Figure 7C). The expansion of the LysM-RLK family in legumes highlights the adaptive evolution of these receptors to engage in microbial associations. Future studies could focus on deciphering the functional

diversity of LysM-RLKs and their downstream components in regulating plant immunity and symbiosis.

Our study extends the understanding of the molecular mechanisms underpinning the AMS. The newly discovered role of LYK8, in particular its synergy with CERK1, serves as an illuminating addition to the broader puzzle of how plants recognize AMF to engage in symbiosis. This knowledge could be pivotal in future efforts to optimize and harness AMS for agricultural advantage. In addition, our findings contribute to a deeper understanding of the complex interplay between CO-mediated symbiosis signaling and immunity, revealing new insights into the strategies plants employ to dissect the two different signaling pathways to interact with beneficial microbes while maintaining defense mechanisms.

## STAR METHODS

Detailed methods are provided in the online version of this paper and include the following:

- KEY RESOURCES TABLE

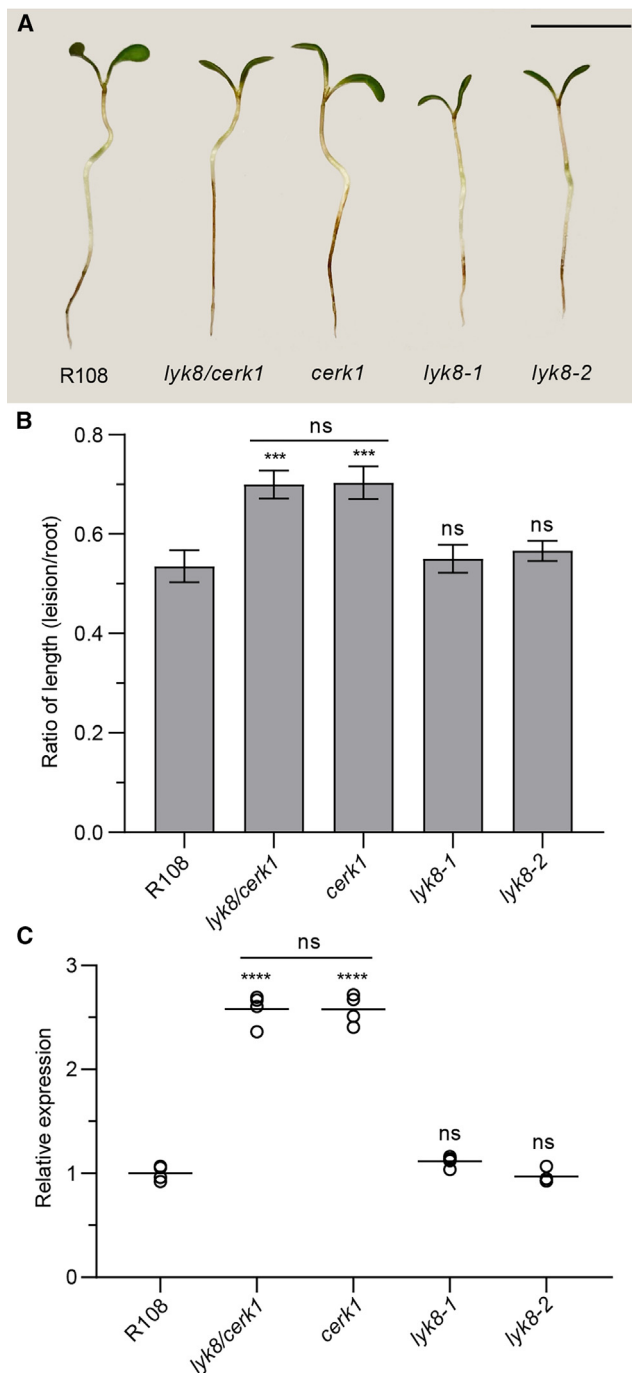

**Figure 6. LYK8 is dispensable for *M. truncatula* resistance against a fungal pathogen**

(A–C) 5-day-old *M. truncatula* seedling roots were inoculated with *F. oxysporum* spores.

(A) Root disease symptoms (scale bars, 1 cm).

(B) Quantification of the ratio of lesion size to the total length of the roots.

(C) Assessment of *F. oxysporum* biomass measured using the fungal gene *FOW1*, relative to the *M. truncatula* gene *Ubiquitin*.

(B and C) These experiments were independently replicated twice. Asterisks denote statistical significance as calculated by one-way ANOVA and Tukey's multiple comparison (mean  $\pm$  SEM,  $n = 15$ ).

● RESOURCE AVAILABILITY

- Lead contact
- Materials availability
- Data and code availability

● EXPERIMENTAL MODEL AND SUBJECT DETAILS

- Plant Materials and growth conditions
- Bacterial and Fungal Strains

● METHOD DETAILS

- Mycorrhizal inoculation
- Root architecture measurement
- Nodulation test
- Molecular cloning and plant complementation
- GUS and WGA staining
- Gene expression analysis
- Nuclear calcium oscillation
- Reactive oxygen species production
- MAPK activity assay
- Pathogen infection
- *Agrobacterium*-mediated transient expression
- BiFC assay
- Chitin beads and CO-biotin binding assays
- Co-IP assay
- Phylogenetic analysis

● QUANTIFICATION AND STATISTICAL ANALYSIS

SUPPLEMENTAL INFORMATION

Supplemental information can be found online at <https://doi.org/10.1016/j.cub.2024.03.015>.

ACKNOWLEDGMENTS

We thank Stephen Marek for providing *F. oxysporum* isolate and Doris Albin-sky, Eirini Vlachaki, and Mara Sgroi for amplifying and providing *G. margarita* inoculum. This work was supported by the OCAST Plant Science Research Program PS21-008 to F.F. and the NIFA grant 2022-67014-38607 as part of the NSF/NIFA Plant Biotic Interactions Program to F.F. G.E.D.O. was funded by the Biotechnology and Biological Sciences as BB/X011933/1 and by the Bill and Melinda Gates Foundation and the Foreign, Commonwealth and Development Office as Enabling Nutrient Symbioses in Agriculture (OPP1172165). S.F. acknowledges NanoBio ICMG (UAR 2607) for providing access to mass spectrometry and NMR facilities and the French National Research Agency-ANR through LABEX ARCANE/EUR CBH-EUR-GS (ANR-17-EURE-0003), Glyc@Alps (ANR-15-IDEX-02), and Carnot Polynat (CARN-025-01) for partial financial support. *M. truncatula Tnt1* seeds were developed and maintained with funding from NSF (DBI-0703285; IOS-1127155; IOS-1733470; DBI-2233714).

AUTHOR CONTRIBUTIONS

J.Z., J.S., C.H.C., F.F., and G.E.D.O. conceived and designed the experi-ments. J.Z., J.S., C.H.C., and K.L. performed the study. D.L. and B.L. pro-vided biotinylated-CO5/CO7 and conducted the binding assay. J.W. and K.S.M. provided the *M. truncatula Tnt1* mutant seeds. S.F. produced CO and LCO molecules. J.Z., F.F., and G.E.D.O. wrote the manuscript with com-ments from J.S. and C.H.C.

DECLARATION OF INTERESTS

The authors declare no competing interests.

Received: October 10, 2023

Revised: February 15, 2024



- combination of chitoooligosaccharide and lipochitoooligosaccharide recognition promotes arbuscular mycorrhizal associations in *Medicago truncatula*. *Nat. Commun.* 10, 5047. <https://doi.org/10.1038/s41467-019-12999-5>.
8. Maillet, F., Poinso, V., André, O., Puech-Pagès, V., Haouy, A., Gueunier, M., Cromer, L., Giraudet, D., Formey, D., Niebel, A., et al. (2011). Fungal lipochitoooligosaccharide symbiotic signals in arbuscular mycorrhiza. *Nature* 469, 58–63. <https://doi.org/10.1038/nature09622>.
  9. Volpe, V., Chialva, M., Mazzarella, T., Crosino, A., Capitanio, S., Costamagna, L., Kohlen, W., and Genre, A. (2023). Long-lasting impact of chitoooligosaccharide application on strigolactone biosynthesis and fungal accommodation promotes arbuscular mycorrhiza in *Medicago truncatula*. *New Phytol.* 237, 2316–2331. <https://doi.org/10.1111/nph.18697>.
  10. Kelly, S., Radutoiu, S., and Stougaard, J. (2017). Legume LysM receptors mediate symbiotic and pathogenic signalling. *Curr. Opin. Plant Biol.* 39, 152–158. <https://doi.org/10.1016/j.cpb.2017.06.013>.
  11. Buendia, L., Girardin, A., Wang, T., Cottret, L., and Lefebvre, B. (2018). LysM receptor-like kinase and LysM receptor-like protein families: an update on phylogeny and functional characterization. *Front. Plant Sci.* 9, 1531. <https://doi.org/10.3389/fpls.2018.01531>.
  12. Khokhani, D., Carrera Carriel, C., Vayla, S., Irving, T.B., Stonoha-Arther, C., Keller, N.P., and Ané, J.M. (2021). Deciphering the chitin code in plant symbiosis, defense, and microbial networks. *Annu. Rev. Microbiol.* 75, 583–607. <https://doi.org/10.1146/annurev-micro-051921-114809>.
  13. Gough, C., and Cullimore, J. (2011). Lipo-chitoooligosaccharide signaling in endosymbiotic plant-microbe interactions. *Mol. Plant Microbe Interact.* 24, 867–878. <https://doi.org/10.1094/MPMI-01-11-0019>.
  14. Chiu, C.H., and Paszkowski, U. (2020). Receptor-like kinases sustain symbiotic scrutiny. *Plant Physiol.* 182, 1597–1612. <https://doi.org/10.1104/pp.19.01341>.
  15. Sun, J., Miller, J.B., Granqvist, E., Wiley-Kalil, A., Gobbato, E., Maillet, F., Cottaz, S., Samain, E., Venkateshwaran, M., Fort, S., et al. (2015). Activation of symbiosis signaling by arbuscular mycorrhizal fungi in legumes and rice. *Plant Cell* 27, 823–838. <https://doi.org/10.1105/tpc.114.131326>.
  16. Gibelin-Viala, C., Amblard, E., Puech-Pages, V., Bonhomme, M., Garcia, M., Bascaules-Bedin, A., Fliegmann, J., Wen, J., Mysore, K.S., le Signor, C., et al. (2019). The *Medicago truncatula* LysM receptor-like kinase LYK9 plays a dual role in immunity and the arbuscular mycorrhizal symbiosis. *New Phytol.* 223, 1516–1529. <https://doi.org/10.1111/nph.15891>.
  17. Miyata, K., Kozaki, T., Kouzai, Y., Ozawa, K., Ishii, K., Asamizu, E., Okabe, Y., Umehara, Y., Miyamoto, A., Kobae, Y., et al. (2014). The bifunctional plant receptor, *OsCERK1*, regulates both chitin-triggered immunity and arbuscular mycorrhizal symbiosis in rice. *Plant Cell Physiol.* 55, 1864–1872. <https://doi.org/10.1093/pcp/pcu129>.
  18. Zhang, X., Dong, W., Sun, J., Feng, F., Deng, Y., He, Z., Oldroyd, G.E.D., and Wang, E. (2015). The receptor kinase *CERK1* has dual functions in symbiosis and immunity signaling. *Plant J.* 81, 258–267. <https://doi.org/10.1111/tpj.12723>.
  19. Zhang, L., Yuan, L., Staehelin, C., Li, Y., Ruan, J., Liang, Z., Xie, Z., Wang, W., Xie, J., and Huang, S. (2019). The LYSIN MOTIF-CONTAINING RECEPTOR-LIKE KINASE 1 protein of banana is required for perception of pathogenic and symbiotic signals. *New Phytol.* 223, 1530–1546. <https://doi.org/10.1111/nph.15888>.
  20. Rutten, L., Miyata, K., Roswanjaya, Y.P., Huisman, R., Bu, F., Hartog, M., Linders, S., van Velzen, R., van Zeijl, A., Bisseling, T., et al. (2020). Duplication of symbiotic lysin motif receptors predates the evolution of nitrogen-fixing nodule symbiosis. *Plant Physiol.* 184, 1004–1023. <https://doi.org/10.1104/pp.19.01420>.
  21. Leppyanen, I.V., Pavlova, O.A., Vashurina, M.A., Bovin, A.D., Dolgikh, A.V., Shtark, O.Y., Sendersky, I.V., Dolgikh, V.V., Tikhonovich, I.A., and Dolgikh, E.A. (2021). LysM receptor-like kinase LYK9 of *Pisum sativum* L. may regulate plant responses to chitoooligosaccharides differing in structure. *Int. J. Mol. Sci.* 22, 711. <https://doi.org/10.3390/ijms22020711>.
  22. Leppyanen, I.V., Shakhnazarova, V.Y., Shtark, O.Y., Vishnevskaya, N.A., Tikhonovich, I.A., and Dolgikh, E.A. (2017). Receptor-like kinase LYK9 in *Pisum sativum* L. is the *CERK1*-Like receptor that controls both plant immunity and AM symbiosis development. *Int. J. Mol. Sci.* 19, 8. <https://doi.org/10.3390/ijms19010008>.
  23. Carotenuto, G., Chabaud, M., Miyata, K., Capozzi, M., Takeda, N., Kaku, H., Shibuya, N., Nakagawa, T., Barker, D.G., and Genre, A. (2017). The rice LysM receptor-like kinase *OsCERK1* is required for the perception of short-chain chitin oligomers in arbuscular mycorrhizal signaling. *New Phytol.* 214, 1440–1446. <https://doi.org/10.1111/nph.14539>.
  24. Bouchiba, Y., Esque, J., Cottret, L., Maréchaux, M., Gaston, M., Gascioli, V., Keller, J., Nouwen, N., Gully, D., Arrighi, J.F., et al. (2022). An integrated approach reveals how lipo-chitoooligosaccharides interact with the lysin motif receptor-like kinase MtLYR3. *Protein Sci.* 31, e4327. <https://doi.org/10.1002/pro.4327>.
  25. Broghammer, A., Krusell, L., Blaise, M., Sauer, J., Sullivan, J.T., Maolanon, N., Vinther, M., Lorentzen, A., Madsen, E.B., Jensen, K.J., et al. (2012). Legume receptors perceive the rhizobial lipochitin oligosaccharide signal molecules by direct binding. *Proc. Natl. Acad. Sci. USA* 109, 13859–13864. <https://doi.org/10.1073/pnas.1205171109>.
  26. Fliegmann, J., Jauneau, A., Pichereaux, C., Rosenberg, C., Gascioli, V., Timmers, A.C.J., Burlet-Schiltz, O., Cullimore, J., and Bono, J.J. (2016). LYR3, a high-affinity LCO-binding protein of *Medicago truncatula*, interacts with LYK3, a key symbiotic receptor. *FEBS Lett.* 590, 1477–1487. <https://doi.org/10.1002/1873-3468.12191>.
  27. Gysel, K., Laursen, M., Thygesen, M.B., Lironi, D., Bozsóki, Z., Hjuler, C.T., Maolanon, N.N., Cheng, J., Bjørk, P.K., Vinther, M., et al. (2021). Kinetic proofreading of lipochitoooligosaccharides determines signal activation of symbiotic plant receptors. *Proc. Natl. Acad. Sci. USA* 118, e2111031118. <https://doi.org/10.1073/pnas.2111031118>.
  28. Malkov, N., Fliegmann, J., Rosenberg, C., Gascioli, V., Timmers, A.J., Nurisso, A., Cullimore, J., and Bono, J.J. (2016). Molecular basis of lipochitoooligosaccharide recognition by the lysin motif receptor-like kinase LYR3 in legumes. *Biochem. J.* 473, 1369–1378. <https://doi.org/10.1042/BCJ20160073>.
  29. Cullimore, J., Fliegmann, J., Gascioli, V., Gibelin-Viala, C., Carles, N., Luu, T.B., Girardin, A., Cumener, M., Maillet, F., Pradeau, S., et al. (2023). Evolution of lipochitoooligosaccharide binding to a LysM-RLK for nodulation in *Medicago truncatula*. *Plant Cell Physiol.* 64, 746–757. <https://doi.org/10.1093/pcp/pcad033>.
  30. Murakami, E., Cheng, J., Gysel, K., Bozsóki, Z., Kawaharada, Y., Hjuler, C.T., Sørensen, K.K., Tao, K., Kelly, S., Venice, F., et al. (2018). Epidermal LysM receptor ensures robust symbiotic signalling in *Lotus japonicus*. *eLife* 7, e33506. <https://doi.org/10.7554/eLife.33506>.
  31. Amor, B.B., Shaw, S.L., Oldroyd, G.E., Maillet, F., Penmetsa, R.V., Cook, D., Long, S.R., Dénarié, J., and Gough, C. (2003). The *NFP* locus of *Medicago truncatula* controls an early step of Nod factor signal transduction upstream of a rapid calcium flux and root hair deformation. *Plant J.* 34, 495–506. <https://doi.org/10.1046/j.1365-313x.2003.01743.x>.
  32. Arrighi, J.F., Barre, A., Ben Amor, B., Bersoult, A., Soriano, L.C., Mirabella, R., de Carvalho-Niebel, F., Journet, E.P., Ghérandi, M., Huguet, T., et al. (2006). The *Medicago truncatula* lysin motif-receptor-like kinase gene family includes *NFP* and new nodule-expressed genes. *Plant Physiol.* 142, 265–279. <https://doi.org/10.1104/pp.106.084657>.
  33. Limpens, E., Franken, C., Smit, P., Willemse, J., Bisseling, T., and Geurts, R. (2003). LysM domain receptor kinases regulating rhizobial Nod factor-induced infection. *Science* 302, 630–633. <https://doi.org/10.1126/science.1090074>.
  34. Madsen, E.B., Madsen, L.H., Radutoiu, S., Olbryt, M., Rakwalska, M., Szczyglowski, K., Sato, S., Kaneko, T., Tabata, S., Sandal, N., and Stougaard, J. (2003). A receptor kinase gene of the LysM type is involved in legume perception of rhizobial signals. *Nature* 425, 637–640. <https://doi.org/10.1038/nature02045>.
  35. Radutoiu, S., Madsen, L.H., Madsen, E.B., Felle, H.H., Umehara, Y., Gronlund, M., Sato, S., Nakamura, Y., Tabata, S., Sandal, N., and Stougaard, J. (2003). Plant recognition of symbiotic bacteria requires



- two LysM receptor-like kinases. *Nature* 425, 585–592. <https://doi.org/10.1038/nature02039>.
36. Smit, P., Limpens, E., Geurts, R., Fedorova, E., Dolgikh, E., Gough, C., and Bisseling, T. (2007). *Medicago LYK3*, an entry receptor in rhizobial nodulation factor signaling. *Plant Physiol.* 145, 183–191. <https://doi.org/10.1104/pp.107.100495>.
  37. Moling, S., Pietraszewska-Bogiel, A., Postma, M., Fedorova, E., Hink, M.A., Limpens, E., Gadella, T.W.J., and Bisseling, T. (2014). Nod factor receptors form heteromeric complexes and are essential for intracellular infection in *medicago* nodules. *Plant Cell* 26, 4188–4199. <https://doi.org/10.1105/tpc.114.129502>.
  38. Buendia, L., Wang, T., Girardin, A., and Lefebvre, B. (2016). The LysM receptor-like kinase *SILYK10* regulates the arbuscular mycorrhizal symbiosis in tomato. *New Phytol.* 210, 184–195. <https://doi.org/10.1111/nph.13753>.
  39. Girardin, A., Wang, T., Ding, Y., Keller, J., Buendia, L., Gaston, M., Ribeyre, C., Gascioli, V., Auriac, M.C., Vernié, T., et al. (2019). LCO receptors involved in arbuscular mycorrhiza are functional for rhizobia perception in legumes. *Curr. Biol.* 29, 4249–4259.e5. <https://doi.org/10.1016/j.cub.2019.11.038>.
  40. Zhang, C., He, J., Dai, H., Wang, G., Zhang, X., Wang, C., Shi, J., Chen, X., Wang, D., and Wang, E. (2021). Discriminating symbiosis and immunity signals by receptor competition in rice. *Proc. Natl. Acad. Sci. USA* 118, e2023738118. <https://doi.org/10.1073/pnas.2023738118>.
  41. Li, X.R., Sun, J., Albinsky, D., Zarrabian, D., Hull, R., Lee, T., Jarratt-Barnham, E., Chiu, C.H., Jacobsen, A., Soumpourou, E., et al. (2022). Nutrient regulation of lipochitooligosaccharide recognition in plants via *NSP1* and *NSP2*. *Nat. Commun.* 13, 6421. <https://doi.org/10.1038/s41467-022-33908-3>.
  42. Miyata, K., Hasegawa, S., Nakajima, E., Nishizawa, Y., Kamiya, K., Yokogawa, H., Shirasaka, S., Maruyama, S., Shibuya, N., and Kaku, H. (2022). OsCERK2/OsRLK10, a homolog of OsCERK1, has a potential role for chitin-triggered immunity and arbuscular mycorrhizal symbiosis in rice. *Plant Biotechnol.* (Tokyo) 39, 119–128. <https://doi.org/10.5511/plantbiotechnology.21.1222a>.
  43. Rasmussen, S.R., Füchtbauer, W., Novero, M., Volpe, V., Malkov, N., Genre, A., Bonfante, P., Stougaard, J., and Radutoiu, S. (2016). Intraradical colonization by arbuscular mycorrhizal fungi triggers induction of a lipochitooligosaccharide receptor. *Sci. Rep.* 6, 29733. <https://doi.org/10.1038/srep29733>.
  44. Jones, J.D.G., and Dangl, J.L. (2006). The plant immune system. *Nature* 444, 323–329. <https://doi.org/10.1038/nature05286>.
  45. Cao, Y., Halane, M.K., Gassmann, W., and Stacey, G. (2017). The role of plant innate immunity in the legume-rhizobium symbiosis. *Annu. Rev. Plant Biol.* 68, 535–561. <https://doi.org/10.1146/annurev-arplant-042916-041030>.
  46. Rey, T., André, O., Nars, A., Dumas, B., Gough, C., Bottin, A., and Jacquet, C. (2019). Lipo-chitooligosaccharide signalling blocks a rapid pathogen-induced ROS burst without impeding immunity. *New Phytol.* 221, 743–749. <https://doi.org/10.1111/nph.15574>.
  47. Zeng, T., Rodriguez-Moreno, L., Mansurkhodzhaev, A., Wang, P., van den Berg, W., Gascioli, V., Cottaz, S., Fort, S., Thomma, B.P.H.J., Bono, J.J., et al. (2020). A lysin motif effector subverts chitin-triggered immunity to facilitate arbuscular mycorrhizal symbiosis. *New Phytol.* 225, 448–460. <https://doi.org/10.1111/nph.16245>.
  48. Wang, T., Gascioli, V., Gaston, M., Medioni, L., Cumener, M., Buendia, L., Yang, B., Bono, J.J., He, G., and Lefebvre, B. (2023). LysM receptor-like kinases involved in immunity perceive lipo-chitooligosaccharides in mycotrophic plants. *Plant Physiol.* 192, 1435–1448. <https://doi.org/10.1093/plphys/kiad059>.
  49. Yu, H., Bai, F., Ji, C., Fan, Z., Luo, J., Ouyang, B., Deng, X., Xiao, S., Bisseling, T., Limpens, E., and Pan, Z. (2023). Plant lysin motif extracellular proteins are required for arbuscular mycorrhizal symbiosis. *Proc. Natl. Acad. Sci. USA* 120, e2301884120. <https://doi.org/10.1073/pnas.2301884120>.
  50. Tadege, M., Wen, J., He, J., Tu, H., Kwak, Y., Eschstruth, A., Cayrel, A., Endre, G., Zhao, P.X., Chabaud, M., et al. (2008). Large-scale insertional mutagenesis using the Tnt1 retrotransposon in the model legume *Medicago truncatula*. *Plant J.* 54, 335–347. <https://doi.org/10.1111/j.1365-313X.2008.03418.x>.
  51. Chiu, C.H., Roszak, P., Orvošová, M., and Paszkowski, U. (2022). Arbuscular mycorrhizal fungi induce lateral root development in angiosperms via a conserved set of MAMP receptors. *Curr. Biol.* 32, 4428–4437.e3. <https://doi.org/10.1016/j.cub.2022.08.069>.
  52. Ding, Y., Gascioli, V., Medioni, L., Gaston, M., de-Regibus, A., Rem-blière, C., Bono, J.J., Cullimore, J., Dalmais, M., Saffray, C., et al. A new group of LysM-RLKs involved in symbiotic signal perception and arbuscular mycorrhiza establishment. Preprint at BioRxiv. <https://doi.org/10.1101/2024.03.06.583654>.
  53. Shinya, T., Osada, T., Desaki, Y., Hatamoto, M., Yamanaka, Y., Hirano, H., Takai, R., Che, F.S., Kaku, H., and Shibuya, N. (2010). Characterization of receptor proteins using affinity cross-linking with biotinylated ligands. *Plant Cell Physiol.* 51, 262–270. <https://doi.org/10.1093/pcp/pcp185>.
  54. Gómez-Gómez, L., and Boller, T. (2000). FLS2: an LRR receptor-like kinase involved in the perception of the bacterial elicitor flagellin in *Arabidopsis*. *Mol. Cell* 5, 1003–1011. [https://doi.org/10.1016/S1097-2765\(00\)80265-8](https://doi.org/10.1016/S1097-2765(00)80265-8).
  55. Li, J., and Chory, J. (1997). A putative leucine-rich repeat receptor kinase involved in brassinosteroid signal transduction. *Cell* 90, 929–938. [https://doi.org/10.1016/s0092-8674\(00\)80357-8](https://doi.org/10.1016/s0092-8674(00)80357-8).
  56. Flegmann, J., Uhlenbroich, S., Shinya, T., Martinez, Y., Lefebvre, B., Shibuya, N., and Bono, J.J. (2011). Biochemical and phylogenetic analysis of CEBiP-like LysM domain-containing extracellular proteins in higher plants. *Plant Physiol. Biochem.* 49, 709–720. <https://doi.org/10.1016/j.plaphy.2011.04.004>.
  57. Sieberer, B.J., Chabaud, M., Fournier, J., Timmers, A.C.J., and Barker, D.G. (2012). A switch in Ca<sup>2+</sup> spiking signature is concomitant with endosymbiotic microbe entry into cortical root cells of *Medicago truncatula*. *Plant J.* 69, 822–830. <https://doi.org/10.1111/j.1365-313X.2011.04834.x>.
  58. Ivanov, S., and Harrison, M.J. (2024). Receptor-associated kinases control the lipid provisioning program in plant-fungal symbiosis. *Science* 383, 443–448. <https://doi.org/10.1126/science.ade1124>.
  59. Liao, D., Sun, X., Wang, N., Song, F., and Liang, Y. (2018). Tomato LysM receptor-like kinase *SILYK12* is involved in arbuscular mycorrhizal symbiosis. *Front. Plant Sci.* 9, 1004. <https://doi.org/10.3389/fpls.2018.01004>.
  60. Rush, T.A., Puech-Pagès, V., Bascaules, A., Jargeat, P., Maillet, F., Haouy, A., Maës, A.Q., Carriel, C.C., Khokhani, D., Keller-Pearson, M., et al. (2020). Lipo-chitooligosaccharides as regulatory signals of fungal growth and development. *Nat. Commun.* 11, 3897. <https://doi.org/10.1038/s41467-020-17615-5>.
  61. Rush, T.A., Tannous, J., Lane, M.J., Gopalakrishnan Meena, M., Carrell, A.A., Golan, J.J., Drott, M.T., Cottaz, S., Fort, S., Ané, J.M., et al. (2022). Lipo-chitooligosaccharides induce specialized fungal metabolite profiles that modulate bacterial growth. *mSystems* 7, e0105222. <https://doi.org/10.1128/mSystems.01052-22>.
  62. Shaw, S.L., and Long, S.R. (2003). Nod factor inhibition of reactive oxygen efflux in a host legume. *Plant Physiol.* 132, 2196–2204. <https://doi.org/10.1104/pp.103.021113>.
  63. Oláh, B., Brière, C., Bécard, G., Dénarié, J., and Gough, C. (2005). Nod factors and a diffusible factor from arbuscular mycorrhizal fungi stimulate lateral root formation in *Medicago truncatula* via the DMI1/DMI2 signalling pathway. *Plant J.* 44, 195–207. <https://doi.org/10.1111/j.1365-313X.2005.02522.x>.
  64. Liang, Y., Cao, Y., Tanaka, K., Thibivilliers, S., Wan, J., Choi, J., Kang, C.H., Qiu, J., and Stacey, G. (2013). Nonlegumes respond to rhizobial Nod factors by suppressing the innate immune response. *Science* 341, 1384–1387. <https://doi.org/10.1126/science.1242736>.
  65. Tanaka, K., Cho, S.H., Lee, H., Pham, A.Q., Batek, J.M., Cui, S., Qiu, J., Khan, S.M., Joshi, T., Zhang, Z.J., et al. (2015). Effect of lipo-chitooligosaccharide on early growth of C4 grass seedlings. *J. Exp. Bot.* 66, 5727–5738. <https://doi.org/10.1093/jxb/erv260>.
  66. Buendia, L., Maillet, F., O'Connor, D., van de-Kerkhove, Q., Danoun, S., Gough, C., Lefebvre, B., and Bensmihen, S. (2019). Lipo-

- chitooligosaccharides promote lateral root formation and modify auxin homeostasis in *Brachypodium distachyon*. *New Phytol.* 221, 2190–2202. <https://doi.org/10.1111/nph.15551>.
67. Bonhomme, M., Bensmihen, S., André, O., Amblard, E., Garcia, M., Mailliet, F., Puech-Pagès, V., Gough, C., Fort, S., Cottaz, S., et al. (2021). Distinct genetic basis for root responses to lipo-chitooligosaccharide signal molecules from different microbial origins. *J. Exp. Bot.* 72, 3821–3834. <https://doi.org/10.1093/jxb/erab096>.
68. Kelly, S., Hansen, S.B., Rübsam, H., Saake, P., Pedersen, E.B., Gysel, K., Madland, E., Wu, S., Wawra, S., Reid, D., et al. (2023). A glycan receptor kinase facilitates intracellular accommodation of arbuscular mycorrhiza and symbiotic rhizobia in the legume *Lotus japonicus*. *PLoS Biol.* 21, e3002127. <https://doi.org/10.1371/journal.pbio.3002127>.
69. Rübsam, H., Krönauer, C., Abel, N.B., Ji, H., Lironi, D., Hansen, S.B., Nadzieja, M., Kolte, M.V., Abel, D., de Jong, N., et al. (2023). Nanobody-driven signaling reveals the core receptor complex in root nodule symbiosis. *Science* 379, 272–277. <https://doi.org/10.1126/science.ade9204>.
70. Leslie, J.F., and Summerell, B.A. (2008). *The Fusarium Laboratory Manual* (John Wiley & Sons).
71. Giovannetti, M., B, M., and Mosse, B. (1980). An evaluation of techniques for measuring vesicular arbuscular mycorrhizal infection in roots. *New Phytol.* 84, 489–500. <https://doi.org/10.1111/j.1469-8137.1980.tb04556.x>.
72. Weber, E., Engler, C., Gruetzner, R., Werner, S., and Marillonnet, S. (2011). A modular cloning system for standardized assembly of multigene constructs. *PLoS One* 6, e16765. <https://doi.org/10.1371/journal.pone.0016765>.
73. Fliegmann, J., Canova, S., Lachaud, C., Uhlenbroich, S., Gascioli, V., Pichereaux, C., Rossignol, M., Rosenberg, C., Cumener, M., Pitorre, D., et al. (2013). Lipo-chitooligosaccharidic symbiotic signals are recognized by LysM receptor-like kinase LYR3 in the legume *Medicago truncatula*. *ACS Chem. Biol.* 8, 1900–1906. <https://doi.org/10.1021/cb400369u>.
74. Li, Y., Mao, L., Yan, D., Ma, T., Shen, J., Guo, M., Wang, Q., Ouyang, C., and Cao, A. (2014). Quantification of *Fusarium oxysporum* in fumigated soils by a newly developed real-time PCR assay to assess the efficacy of fumigants for *Fusarium* wilt disease in strawberry plants. *Pest Manag. Sci.* 70, 1669–1675. <https://doi.org/10.1002/ps.3700>.

STAR★METHODS

KEY RESOURCES TABLE

| REAGENT or RESOURCE                                     | SOURCE                             | IDENTIFIER                        |
|---------------------------------------------------------|------------------------------------|-----------------------------------|
| <b>Antibodies</b>                                       |                                    |                                   |
| Phospho-p44/42 MAPK (Erk1/2) (Thr202/Tyr204) Rabbit mAb | Cell Signaling Technology          | Cat#4370; RRID: AB_2315112        |
| Mouse monoclonal anti-Tubulin (clone B-5-1-2)           | Sigma-Aldrich                      | Cat#T5168; RRID: AB_477579        |
| Mouse monoclonal ANTI-FLAG M2-Peroxidase antibody       | Sigma-Aldrich                      | Cat#A8592-2MG; RRID: AB_439702    |
| Mouse monoclonal anti-GFP (clones 7.1 and 13.1)         | Roche                              | Cat# 11814460001; RRID: AB_390913 |
| Rat monoclonal Anti-HA-Peroxidase antibody              | Roche                              | Cat# 12013819001; RRID: AB_390917 |
| Goat anti-mouse IgG (H+L)-HRP Conjugate                 | Biorad                             | Cat# 1706516; RRID: AB_2921252    |
| Goat anti-rabbit IgG-HRP Conjugate                      | Sigma-Aldrich                      | Cat# A0545-1ML; RRID: AB_257896   |
| <b>Bacterial and fungal strains</b>                     |                                    |                                   |
| <i>Ensifer meliloti</i> Em1021                          | Lab stock                          | N/A                               |
| <i>Agrobacterium tumefaciens</i> GV3101                 | Lab stock                          | N/A                               |
| <i>Agrobacterium rhizogenes</i> AR1193                  | Lab stock                          | N/A                               |
| <i>Fusarium oxysporum</i>                               | From Stephen Marek                 | N/A                               |
| <i>Rhizophagus irregularis</i>                          | Premier Tech                       | N/A                               |
| <i>Gigaspora margarita</i>                              | From Paola Bonfante                | N/A                               |
| <b>Chemicals, peptides, and recombinant proteins</b>    |                                    |                                   |
| X-Gluc                                                  | Goldbio                            | B735                              |
| WGA-Alexa Fluor 488                                     | Thermo Fisher                      | W11261                            |
| Aminoethoxyvinylglycine (AVG)                           | Sigma-Aldrich                      | A6685                             |
| CO4                                                     | Megazyme                           | O-CHI4                            |
| CO8                                                     | From Sébastien Fort                | N/A                               |
| LCOs                                                    | From Sébastien Fort                | N/A                               |
| CO5-biotin                                              | Cullimore et al. <sup>29</sup>     | N/A                               |
| CO7-biotin                                              | Cullimore et al. <sup>29</sup>     | N/A                               |
| Peroxidase from horseradish                             | Sigma-Aldrich                      | P6782                             |
| L-012                                                   | Wako chemicals                     | 120-04891                         |
| cOmplete EDTA-free Protease Inhibitor Cocktail          | Roche                              | 11873580001                       |
| PhosSTOP                                                | Roche                              | 4906837001                        |
| Chitin Resin                                            | New England Biolabs                | S6651                             |
| ANTI-FLAG M2 Affinity Agarose Gel                       | Sigma-Aldrich                      | A2220                             |
| ChromoTek GFP-Trap® Magnetic Agarose                    | Proteintech                        | gtma                              |
| Streptavidin, HRP conjugate                             | Thermo Fisher                      | S911                              |
| RQ1 RNase-Free DNase                                    | Promega                            | M6101                             |
| Typan Blue                                              | Sigma-Aldrich                      | T6146                             |
| <b>Critical commercial assays</b>                       |                                    |                                   |
| NEBridge® Ligase Master Mix                             | New England Biolabs                | M1100S                            |
| Bsal-HF®v2                                              | New England Biolabs                | R3733                             |
| BbsI-HF                                                 | New England Biolabs                | R3539                             |
| LunaScript RT SuperMix Kit                              | New England Biolabs                | E3130                             |
| Luna Universal qPCR Master Mix                          | New England Biolabs                | M3003                             |
| OneTaq Quick-Load 2X Master Mix                         | New England Biolabs                | M0486                             |
| Spectrum™ Plant Total RNA Kit                           | Sigma-Aldrich                      | STRN250                           |
| Turface MVP                                             | American Plant Products & Services | N/A                               |
| Vermiculite                                             | American Plant Products & Services | N/A                               |

(Continued on next page)

| REAGENT or RESOURCE                          | SOURCE                         | IDENTIFIER    |
|----------------------------------------------|--------------------------------|---------------|
| <b>Continued</b>                             |                                |               |
| Experimental models: Organisms/strains       |                                |               |
| <i>M. truncatula</i> R108                    | Lab stock                      | N/A           |
| <i>M. truncatula</i> R108 YC3.6              | Feng et al. <sup>7</sup>       | N/A           |
| <i>M. truncatula</i> <i>cerk1</i>            | Feng et al. <sup>7</sup>       | NF16753       |
| <i>M. truncatula</i> <i>nfp-3</i>            | Feng et al. <sup>7</sup>       | NF7796        |
| <i>M. truncatula</i> <i>lyk6</i>             | Oklahoma State University      | NF14155       |
| <i>M. truncatula</i> <i>lyk7</i>             | Oklahoma State University      | NF8175        |
| <i>M. truncatula</i> <i>lyk8-1</i>           | Oklahoma State University      | NF9395        |
| <i>M. truncatula</i> <i>lyk8-2</i>           | Oklahoma State University      | NF11260       |
| <i>M. truncatula</i> <i>lyk10</i>            | Oklahoma State University      | NF20763       |
| <i>M. truncatula</i> <i>lyk8/cerk1</i>       | This study                     | N/A           |
| <i>M. truncatula</i> <i>lyk8/nfp</i>         | This study                     | N/A           |
| <i>M. truncatula</i> <i>cerk1</i> YC3.6      | This study                     | N/A           |
| <i>M. truncatula</i> <i>lyk8-1</i> YC3.6     | This study                     | N/A           |
| <i>M. truncatula</i> <i>lyk8/cerk1</i> YC3.6 | This study                     | N/A           |
| <i>M. truncatula</i> <i>lyk6/cerk1</i>       | This study                     | N/A           |
| <i>M. truncatula</i> <i>lyk7/cerk1</i>       | This study                     | N/A           |
| <i>M. truncatula</i> <i>lyk10/cerk1</i>      | This study                     | N/A           |
| <i>N. Benthamiana</i>                        | Lab stock                      | N/A           |
| Oligonucleotides                             |                                |               |
| Primers                                      | Table S1                       | N/A           |
| Recombinant DNA                              |                                |               |
| pL2B-tYFPNLS-CERK1-3×FLAG-LYK8-3×HA          | This study                     | N/A           |
| pL2B-LAP1-proLYK8-GUS                        | This study                     | N/A           |
| pL2B-LAP1-proCERK1-GUS                       | This study                     | N/A           |
| pL1M-R2-pro35S-LYK8-3×HA-T35S                | This study                     | N/A           |
| pL1M-R2-pro35S-LYK8-3×FLAG-T35S              | This study                     | N/A           |
| pL1M-R2-pro35S-LYR4-3×HA-T35S                | This study                     | N/A           |
| pL1M-R2-pro35S-LYK3-3×HA-T35S                | This study                     | N/A           |
| pL1M-R2-pro35S-CERK1-3×HA-T35S               | This study                     | N/A           |
| pL1M-R1-pro35S-LYK8-VYNE-T35S                | This study                     | N/A           |
| pL1M-R2-pro35S-CERK1-VYCE-TOcs               | This study                     | N/A           |
| pL1M-R2-proLjUBI1-DMI2-VYCE-TOcs             | This study                     | N/A           |
| pL1M-R2-pro35S-LYR4-VYCE-TOcs                | This study                     | N/A           |
| pL1M-R2-pro35S-AtFLS2-VYCE-TOcs              | This study                     | N/A           |
| pL1M-R2-pro35S-AtBRI1-VYCE-TOcs              | This study                     | N/A           |
| pL1M-R2-pro35S-MtLYM1-VYCE-TOcs              | This study                     | N/A           |
| pL1M-R2-pro35S-VYCE-TOcs                     | This study                     | N/A           |
| pL1M-R3-proLjUBI1-DMI2-3×HA-TNOS             | This study                     | N/A           |
| pL1M-R2-pro35S-AtFLS2-3×HA-T35S              | This study                     | N/A           |
| pL1M-R3-proLjUBI1-AtBRI1-3×HA-TNOS           | This study                     | N/A           |
| pL1M-R2-pro35S-MtLYM1-3×HA-T35S              | This study                     | N/A           |
| pCAMBIA-pro35S-LYK8ect-NFPtmic-YFP           | This study                     | N/A           |
| pCAMBIA-pro35S-MtLYR8ect-NFPtmic-YFP         | Ding et al. <sup>52</sup>      | N/A           |
| pCAMBIA-pro35S-OsCEBiP8ect-NFPtmic-YFP       | Cullimore et al. <sup>29</sup> | N/A           |
| Software and algorithms                      |                                |               |
| ImageJ                                       | National Institute of Health   | Version 1.54f |
| ZEN Blue Version                             | Zeiss                          | Version 3.8   |
| Prism                                        | GraphPad Software              | Version 9.5.0 |

(Continued on next page)



**Continued**

| REAGENT or RESOURCE | SOURCE                                                           | IDENTIFIER    |
|---------------------|------------------------------------------------------------------|---------------|
| MEGA                | <a href="http://www.megasoftware.net/">www.megasoftware.net/</a> | Version 11    |
| ITOL                | <a href="http://itol.embl.de/">itol.embl.de/</a>                 | Version 6.8.1 |

**RESOURCE AVAILABILITY**

**Lead contact**

Further information and requests for resources and reagents should be directed to and will be fulfilled by the lead contact, Feng Feng ([feng.feng@okstate.edu](mailto:feng.feng@okstate.edu)).

**Materials availability**

The plasmids and plant materials generated in this study can be provided upon request and following the requisite material transfer agreement (MTA) with the originating institution(s) responsible for generating the mutant line(s).

**Data and code availability**

- No sequencing data or accession numbers were produced as part of this study. Original data reported in this paper will be shared by the [lead contact](#) upon request.
- This paper does not report original code.
- Any additional information required to reanalyze the data reported in this paper is available from the [lead contact](#) upon request.

**EXPERIMENTAL MODEL AND SUBJECT DETAILS**

**Plant Materials and growth conditions**

*M. truncatula* cv. R108 was used as the wild-type, *cerk1* (NF16753) and *nfp-3* (NF7796) mutants were reported previously.<sup>7</sup> The *Tnt1* transposon insertion mutants *lyk6* (NF14155), *lyk7* (NF8175), *lyk10* (NF20763) *lyk8-1* (NF9395) and *lyk8-2* (NF11260) were obtained from the Oklahoma State University. The calcium reporter Yellow Cameleon (YC) 3.6 was introduced into the above-mentioned mutant lines by crossing them with an existing stable YC3.6 transgenic line. *M. truncatula* seeds were lightly scarified using sandpaper, sterilized in 10% sodium hypochlorite for 1.5 minutes, and then rinsed five times with sterilized water. The seeds were subsequently transferred to 1.5% water agar plates and stored in the dark at 4°C for three days before being germinated at room temperature. Seedlings were then either cultivated on responsive medium or grown in a mixture of soil substrates, depending on the requirements of the experiments (a 3:3:1 mixture of Turface MVP, play sand, and LC1 grower mix for mycorrhizal inoculation; a 1:1 mixture of vermiculite and Turface MVP for rhizobial inoculation). Five-week-old *Nicotiana benthamiana* leaves were used for protein expression. The plants were grown in a plant growth room at 22°C under a 16:8 photoperiod. Primers used for mutant identification are listed in [Table S1](#).

**Bacterial and Fungal Strains**

*Ensifer meliloti* strain Em1021 was cultivated at 28°C on TY medium supplemented with appropriate antibiotics. *Agrobacterium tumefaciens* strain GV3101 and *Agrobacterium rhizogenes* strain AR1193 were incubated at 28°C on LB medium supplemented with antibiotics. *Rhizophagus irregularis* powder was purchased from Premier Tech, Canada or maintained in a carrot root organ culture as described previously.<sup>51</sup> *Gigaspora margarita* BEG-34 was kindly provided by Professor Paola Bonfante and grown in co-culture with *Tagetes patula* (French marigold) in a sterile substrate of sand-terragreen mix in a glasshouse for approximately 4 months until maximum mycorrhizal colonization was achieved. The pots were then dried, plant material removed, and the substrate sieved to produce a crude inoculum containing spores and infective propagules. The inoculum was stored at 4°C under low (< 7 %) relative humidity. *Fusarium oxysporum* was originally isolated from alfalfa roots and cultivated on Synthetischer Nährstoffarmer Agar (SNA)<sup>70</sup> for at least 7 days before collection of spores.

**METHOD DETAILS**

**Mycorrhizal inoculation**

*M. truncatula* wild-type and mutant plants were cultivated in 48-well trays containing a mixture of soil substrates (3:3:1 mixture of Turface MVP, play sand, and LC1 grower mix). They were inoculated with *Rhizophagus irregularis* at a rate of 100 spores per plant for low-concentration inoculation and 300 spores per plant for high-concentration inoculation. For *Gigaspora margarita* inoculation, an inoculation strength of 5 % (v/v) per plant was used. For the co-cultivation of *lyk8/cerk1* plants with nurse plants, one wild-type *M. truncatula* R108 was grown alongside one *lyk8/cerk1* plant. Roots colonized by mycorrhizae were harvested at specified time points and subjected to staining with ink or 0.05% Trypan Blue. To assess the extent of mycorrhizal colonization, we used the gridline

intersect method.<sup>71</sup> Briefly, root segments were cut into smaller pieces and randomly distributed across a square Petri dish, which featured a 1 cm × 1 cm grid on its base. Using a Leica EZ4 stereomicroscope, 100 grid intersections were examined for each root sample to evaluate the AMF colonization and infection events. Representative images were taken using a Keyence VHX-5000 Digital Microscope (Keyence, UK).

### Root architecture measurement

To quantify root development, root samples were harvested three weeks post-inoculation with *R. irregularis*, rinsed with tap water, and subsequently preserved in 50% (v/v) ethanol as described previously.<sup>51</sup> The length of the primary root was determined using a ruler, and the first-order of lateral roots were counted using a Leica EZ4 stereomicroscope.

### Nodulation test

Wild-type R108 and receptor mutant seedlings were grown in a 1:1 mixture of vermiculite and Turface MVP. The seedlings were watered twice weekly with B&D liquid medium and received additional tap water once per week. After 7 days of growth, the plant roots were inoculated with *E. melliloti* 1021 at an OD<sub>600</sub> of 0.03. Following inoculation, the plants were continuously watered with B&D medium and tap water for three weeks. The roots were then harvested, rinsed with tap water, and the number of pink and white nodules on each root was quantified.

### Molecular cloning and plant complementation

In the promoter-GUS assay, a 2.3 kb sequence upstream of either the *LYK8* or *CERK1* coding region was synthesized by Twist Bioscience, USA. This upstream sequence, serving as the native promoter, was then fused to the GUS reporter module to generate the construct by Golden Gate cloning,<sup>72</sup> which was subsequently introduced into the *A. rhizogenes* AR1193 for hairy root transformation. To complement the *lyk8/cerk1* double mutant, we utilized Golden Gate cloning to create a single construct comprising both the *LYK8* and *CERK1* genes, as well as a nucleus localized triple YFP fluorescence marker (tYFP-NLS) for the selection of transformed plant roots. In this construct, the synthesized coding sequences of *LYK8* and *CERK1* were individually fused with a 3×HA and a 3×Flag peptide, respectively, each under the control of its own native promoter. We then introduced this construct into *A. rhizogenes* and transferred it into *lyk8/cerk1* plants through hairy root transformation. Roots with YFP signal and transformed with either an empty vector or with the *LYK8* and *CERK1* construct were then inoculated with *R. irregularis* spores. To assess the protein expression levels of *LYK8* and *CERK1*, an equal amount of transformed roots was harvested three weeks post-AMF inoculation for protein extraction. Western blotting, employing anti-HA and anti-FLAG antibodies, was then conducted to verify the expression of *LYK8* and *CERK1* proteins in the complementation plants.

To generate constructs for protein expression in *N. benthamiana*, synthesized coding sequences of various genes, including *LYK8*, *CERK1*, *DMI2*, *LYR4*, *LYK3*, *AtFLS2*, *AtBRI1*, and *MtLYM1*, were fused with either a 3×HA or 3×FLAG tag. This resulted in the generation of constructs such as *LYK8*-HA, *CERK1*-HA, *DMI2*-HA, *LYR4*-HA, *LYK3*-HA, *AtFLS2*-HA, *AtBRI1*-HA, and *MtLYM1*-HA, as well as *LYK8*-FLAG. For the CO5/CO7 binding assay, we amplified the sequence representing the extracellular domain of *LYK8* (*LYK8*ect, amino acids 1-223) from *M. truncatula* cDNA using PCR (primer details in Table S1). This sequence was then fused in-frame with the coding regions for the transmembrane and intracellular domains of MtNFP (NFP<sub>tmic</sub>), followed by a YFP tag, all under the control of CaMV 35S promoter. This fusion construct of *LYK8* was used to maintain consistency with the constructs of two positive controls, MtLYR8ect-NFP<sub>tmic</sub>-YFP and OsCEBIPect-NFP<sub>tmic</sub>-YFP, which were created similarly.<sup>29,52,73</sup> For the bimolecular fluorescence complementation (BiFC) assay, the *LYK8* coding sequence was fused with the N-terminal fragment of the yellow fluorescent protein Venus (VYNE). The coding sequences for *CERK1*, *LYR4*, *DMI2*, *AtFLS2*, *AtBRI1*, and *MtLYM1* were fused with the C-terminal fragment of Venus (VYCE). All these constructs were subsequently transformed into *Agrobacterium* GV3101 for transient expression in the leaves of *N. benthamiana*.

### GUS and WGA staining

*M. truncatula* wild-type roots harboring a promoter-GUS construct, introduced through hairy root transformation, were cultivated in a soil mixture inoculated with mycorrhizal spores. These plant roots were harvested at intervals of one week, two weeks, and three weeks after inoculation. Subsequently, the roots were rinsed and subjected to GUS staining using 1 mg/mL X-Gluc staining buffer, which consists of 100 mM NaP buffer, 10 mM EDTA, and 1 mM potassium ferricyanide. The samples were incubated at 37°C for 6 hours and then washed with 70% ethanol and cleared in a 20% KOH solution. A final staining step was carried out using WGA-Alexa Fluor 488 dye (Thermo Fisher), dissolved in PBS buffer at a concentration of 0.5 μg/mL, and the samples were incubated for an additional 6 hours. Images of the stained samples were captured using a fluorescence microscope (BX51, Olympus, Japan).

### Gene expression analysis

*M. truncatula* wild-type and mutant plants were cultured on Buffered Nodulation Media (BNM) agar plates for seven days. Afterward, the plants were moved to liquid BNM with or without adding elicitors such as 10<sup>-7</sup> M CO4 (Megazyme), 10<sup>-7</sup> M CO8 (produced by Sébastien Fort) and 10<sup>-8</sup> M LCO (LCO from *E. melliloti* 1021, produced by Sébastien Fort). To induce symbiotic gene expression, the plant roots were treated with CO or LCO for 6 hours. For the induction of immune marker genes, a 30-minute incubation of CO8 was utilized. We used eight roots for each treatment and conducted three biological replicates for each time point. Regarding gene expression triggered by AMF, roots infected for 3 and 5 weeks were washed and collected for RNA extraction. The root samples

were frozen using liquid nitrogen, and total RNA was extracted using a plant RNA extraction kit (Sigma). Genomic DNA was eliminated by treating with RNase-free DNase (Sigma) according to the manufacturer's instructions. The concentration of the produced total RNA was determined using the NanoDrop-1000 Spectrophotometer (Thermo Fisher).

For real-time qPCR analysis, 300 ng of total RNA from each sample was utilized for cDNA synthesis with a LunaScript RT SuperMix Kit (New England Biolabs). Gene expression was determined using a CFX96 touch real-time PCR system (Bio-Rad), with 10 ng of cDNA template amplified using a Luna-SYBR green PCR master mix (New England Biolabs). Expression data were analyzed using an *M. truncatula* endogenous *Ubiquitin* gene as a reference. The fold change in gene expression was calculated for samples treated with elicitors or AMF in comparison to those subjected to water treatment or no AMF inoculation. For the Semi-quantitative RT-PCR analysis in Figures S1B and S1C, 10 ng of synthesized cDNA was added into PCR reaction. The primers for detecting the expression of symbiotic genes (*MtVapyrin*, *MtLYK10*, *MtD27*, *MtPT4*), defense genes (*MtPR10*, *MtChitinase*, *MtRbohA*), and the receptors (*LYK8*, *MtLYK6*, *MtLYK7*) can be found in Table S1.

### Nuclear calcium oscillation

To assess periodic calcium oscillation, seedlings of *M. truncatula* wild-type and different receptor mutants containing the YC3.6 reporter were cultured on BNM agar plates supplemented with 100 nM AVG until lateral roots emerged. Only plant roots exhibiting strong YFP fluorescence were selected to assess the calcium response upon exposure to CO and LCO at specified doses. Calcium spiking was measured using an inverted epifluorescence microscope (TE2000, Nikon, Japan). Analysis of the fluorescent signal and the calcium spike curve followed the methodology outlined in a previous study.<sup>15</sup>

### Reactive oxygen species production

*M. truncatula* wild-type and mutant plants were grown on BNM agar plates supplemented with 100 nM AVG for four days. Following this, the primary roots, which were about 4 cm in length, were segmented into 0.5 cm strips and placed in a 96-well microplate containing 200  $\mu$ L of water in each well. An overnight incubation was conducted to eliminate internal ROS generated during the process of root segmentation. After incubation, water was removed from each well and replaced with 100  $\mu$ L of reaction buffer containing  $10^{-6}$  M CO<sub>2</sub>, 10  $\mu$ g/mL horseradish peroxidase and 0.5 mM L-012. Luminescence was recorded with a Synergy H1 microplate reader (BioTek, USA) at indicated time points with a 1000 ms integration time. For each genotype and treatment, at least six samples were used as biological replication.

### MAPK activity assay

Roots of four-day-old *M. truncatula* plants, cultivated on BNM agar plates supplemented with 100 nM AVG, were cut into small segments and subsequently incubated in water for 4 hours. The root samples were then exposed to either  $10^{-6}$  M CO<sub>2</sub> for 10 minutes or were left untreated before being rapidly frozen in liquid nitrogen for protein extraction. Root proteins were then homogenized using an extraction buffer composed of 50 mM HEPES-KOH pH 7.5, 50 mM NaCl, 1 mM PMSF, 5% Glycerol, 1 mM NaF, 1 mM EDTA, 0.2% Triton X-100, 2 mM DTT, complete protease inhibitors and the PhoSTOP phosphatase inhibitor. For the assessment of MPK3 and MPK6 phosphorylation, an anti-pERK antibody was employed. A duplicate blot was used to detect *M. truncatula* Tubulin, serving as the endogenous reference for equal loading, utilizing an anti-tubulin antibody.

### Pathogen infection

*F. oxysporum* was cultured on SNA solid medium for a minimum of seven days. Sterilized, prechilled water (between 5-10 mL) was added to each plate and allowed to stand for 1 hour to release spores. The spore concentration was quantified using a hemacytometer. *M. truncatula* wild-type and mutant seedlings were grown on 0.8% agarose plates for 36 hours. The root tip regions were inoculated with *F. oxysporum* spores at a concentration of  $1 \times 10^6$  spores/mL. For assessing *F. oxysporum* growth, 15 seedlings were collected at 48 hours post-inoculation to measure lesion size, which was then normalized against individual root length. The same root samples were then frozen in liquid nitrogen to extract DNA for quantitative PCR analysis, which utilized the *F. oxysporum* FOW1<sup>74</sup> gene in relation to the *M. truncatula* *Ubiquitin* gene.

### Agrobacterium-mediated transient expression

The *A. tumefaciens* GV3101 carrying the specified binary vectors were cultivated in Luria-Bertani (LB) medium, supplemented with the appropriate antibiotics, at 28 °C overnight. Following this step, the bacterial cells were collected and resuspended in an infiltration buffer (10 mM MgCl<sub>2</sub>, 10 mM MES, pH 5.7, and 100  $\mu$ M acetosyringone), followed by a 3-hour incubation at 28 °C. The optical density of the bacterial suspension was adjusted to a final concentration of OD<sub>600</sub> = 0.5. This suspension was then combined with *A. tumefaciens* containing a P19 protein before being infiltrated into the fully expanded *N. benthamiana* leaves using a syringe without a needle. Subsequently, the plants were covered with a black plastic bag for 12 hours to facilitate *A. tumefaciens* infection. Infiltrated leaves were collected at either 24 or 36 hours, depending on the specific experimental requirements.

### BiFC assay

The *N. benthamiana* leaves expressing split-Venus proteins were harvested 36 hours after *A. tumefaciens* infiltration. To visualize the fluorescent signal, leaf tissue near the infiltration site was employed for microscopic analysis under a laser scanning confocal microscope (LSM 980, Zeiss, Germany), utilizing YFP filters: 514 nm for excitation and 540 nm for emission.

### Chitin beads and CO-biotin binding assays

*Agrobacterium* GV3101 transformants carrying the LYK8-HA, CERK1-HA, LYR4-HA, and LYK3-HA constructs were infiltrated into *N. benthamiana* leaves and left for 36 hours to induce protein expression. Subsequently, the infiltrated leaves were ground into fine powder using liquid nitrogen, and the total powder was mixed with 1 mL of cold lysis buffer (50 mM HEPES-KOH pH 7.5, 50 mM NaCl, 1 mM PMSF, 5% Glycerol, 1 mM NaF, 1 mM EDTA, 0.2% Triton X-100, 2 mM DTT, complete protease inhibitors, and 2% PVPP) for extracting receptor proteins. The protein lysate was then subjected to centrifugation, and the resulting supernatant was transferred to a new tube for the chitin binding assay. To initiate the binding process, 20  $\mu$ L of chitin resin beads (New England Biolabs) were washed three times by adding 1 mL of lysis buffer (without PVPP) and subsequently incubated with the extracted proteins for 3 hours in a cold room. After incubation, the beads were centrifuged and washed once with 1 mL of wash buffer I (50 mM HEPES-KOH pH 7.5, 400 mM NaCl, 1 mM EDTA, 0.2% Triton X-100, and 2 mM DTT), followed by three washes with buffer II (buffer I without NaCl), and finally, a last wash with buffer III (buffer I without NaCl and Triton X-100). The bound protein was recovered by boiling beads with SDS loading buffer.

To assess the binding affinity of receptors with CO5 and CO7, constructs encoding LYK8ect-NFPtmic-YFP, MtLYR8ect-NFPtmic-YFP, and OsCEBIPect-NFPtmic-YFP were expressed in *N. benthamiana* leaves, and the membrane fractions were isolated as previously described.<sup>39</sup> The synthesis of cross-linkable and biotinylated versions of CO5-biotin and CO7-biotin has been detailed in earlier work.<sup>29</sup> Binding assays with different concentrations of CO-biotin were conducted using membrane fractions in a buffer (25 mM NaCacodylate pH 6.0, 1 mM MgCl<sub>2</sub>, 1 mM CaCl<sub>2</sub>, 250 mM Saccharose and protease inhibitors) for 1 hour on ice. After incubation, samples were centrifuged at 31,000 g for 30 minutes at 4 °C, and the pellets were resuspended in IP buffer (25 mM Tris-HCl pH 7.5, 150 mM NaCl, 10 % glycerol, supplemented with protease inhibitors and the phosphatase inhibitor). The proteins were then solubilized in the IP buffer containing 0.2 % DDM detergent for 1 hour at 4 °C and immunoprecipitated using GFP-trap magnetic agarose beads (ChromoTek). Following washing in IP buffer, proteins were eluted with Laemmli buffer. Western blot analysis utilized anti-HA, anti-GFP and Streptavidin to verify the presence of the receptor proteins and their binding with chitin and CO-biotin, respectively.

### Co-IP assay

*N. benthamiana* leaves were infiltrated with *Agrobacterium* GV3101 transformants carrying designated constructs and incubated for 36 hours to facilitate protein expression. Afterward, the leaves were infiltrated with 1  $\mu$ M of CO4, CO8, or water for 10 minutes, followed by protein extraction. One gram of *Agrobacterium*-infected leaf tissue was homogenized into a fine powder in liquid nitrogen using a mortar and pestle. Protein extraction was performed by adding cold lysis buffer (50 mM HEPES-KOH pH 7.5, 150 mM NaCl, 1 mM PMSF, 5% Glycerol, 1 mM NaF, 1 mM EDTA, 0.5 % Triton X-100, 2 mM DTT, complete protease inhibitors, and 2% PVPP) to the samples, followed by a 10-minute incubation on ice. Subsequently, the protein lysate underwent centrifugation, and the resulting supernatants were filtered through a 0.45  $\mu$ m filter. Ten microliters of cell extracts were used as input to demonstrate the expression of each protein. The remaining cell extracts were combined with 25  $\mu$ L of pre-washed anti-FLAG M2 agarose resin beads (Sigma) and incubated for 4 hours at 4 °C. Afterward, the agarose beads were subjected to centrifugation and washed with washing buffers as detailed in the chitin binding section. The protein complexes associated with the beads were recovered by boiling them with SDS loading buffer for 5 minutes. The presence of HA- and FLAG-tagged proteins was subsequently assessed using anti-HA and anti-FLAG antibodies in a western blot analysis.

### Phylogenetic analysis

Protein sequences of the LYK-type LysM-RLK family across several species, including *M. truncatula*, *L. japonicus*, *S. lycopersicum*, *O. sativa*, *Brachypodium distachyon*, *A. thaliana* and *P. andersonii* were obtained from National Center for Biotechnology Information (details listed in Table S2). These sequences were aligned using MUSCLE. Subsequently, a neighbor-joining phylogenetic tree was constructed using MEGA software and modified by iTOL website.

### QUANTIFICATION AND STATISTICAL ANALYSIS

Statistical analysis was performed using GraphPad Prism 9.5.0 software. This analysis involved employing one-way or two-way analysis of variance (ANOVA) followed by Tukey's multiple comparisons test or multiple Student's *t*-tests. The error bars represent the standard error of the mean (S.E.M.). Statistically significant differences were denoted by asterisks (ns,  $p > 0.05$ ; \*,  $p < 0.05$ ; \*\*,  $p < 0.01$ ; \*\*\*,  $p < 0.001$ , \*\*\*\*,  $p < 0.0001$ ) to indicate samples with significant distinctions. The real-time qPCR data were shown using dot plots to reflect the data distribution, and the normality of samples was confirmed by the Shapiro-Wilk test. Detailed sample size and statistical differences are available in the figure legends.



**Current Biology, Volume 34**

**Supplemental Information**

**A receptor required for chitin perception  
facilitates arbuscular mycorrhizal associations  
and distinguishes root symbiosis from immunity**

**Jingyi Zhang, Jongho Sun, Chai Hao Chiu, David Landry, Kangping Li, Jiangqi Wen, Kirankumar S. Mysore, Sébastien Fort, Benoit Lefebvre, Giles E.D. Oldroyd, and Feng Feng**

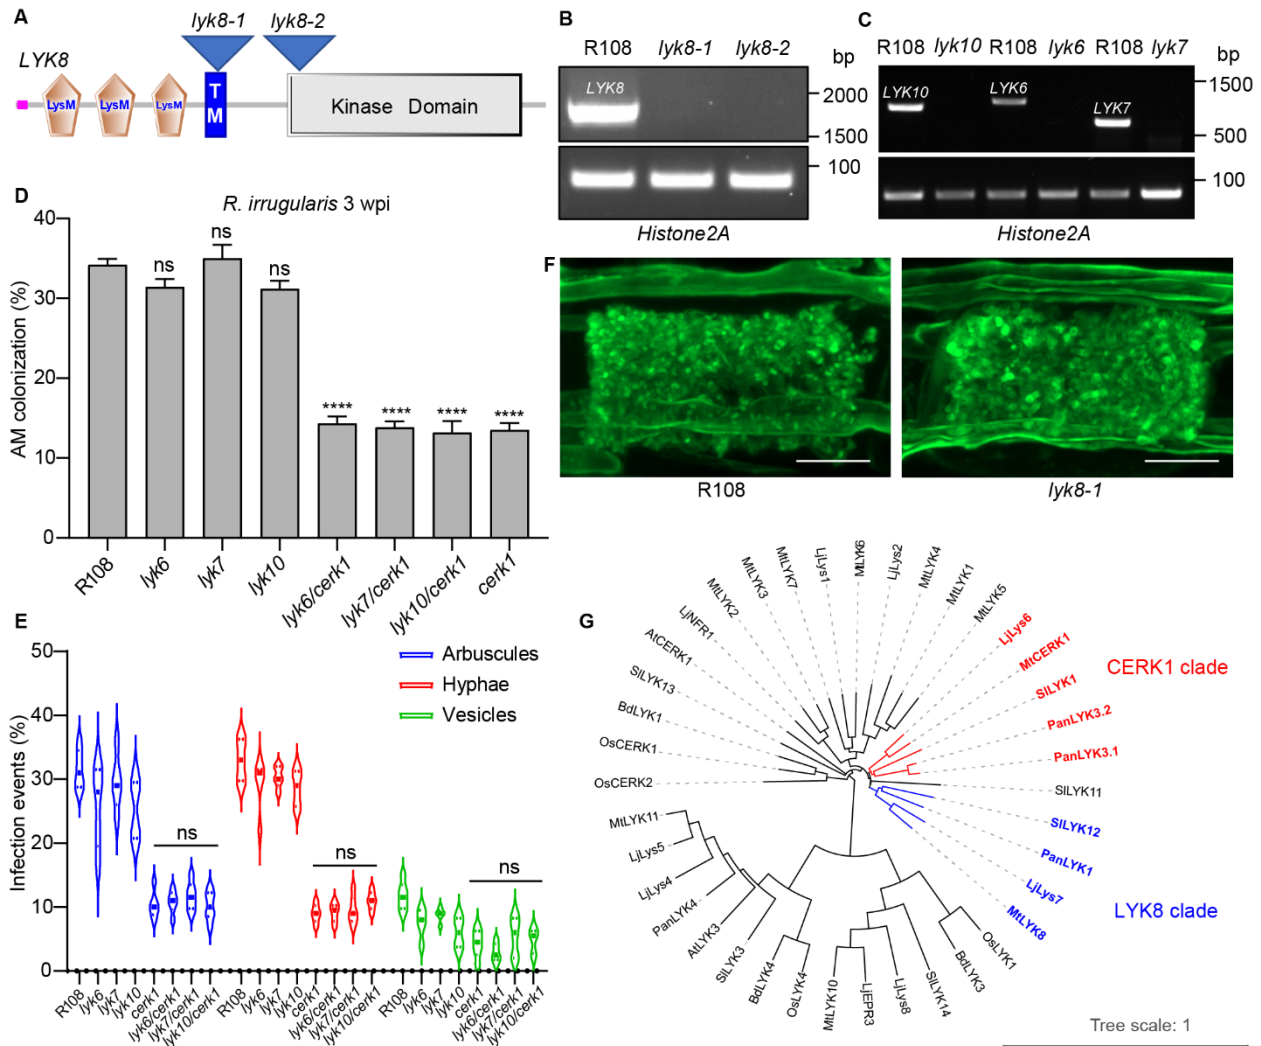

**Figure S1. Genetic screen of single and double mutants of *M.truncatula* LysM-RLKs in AMF symbiosis. Related to Figure 1.**

(A) The diagram illustrates the protein domains of LYK8 and highlights the positioning of *Tnt1* insertions associated with the mutant alleles. The LYK8 protein contains three extracellular LysM domains, a transmembrane domain (TM), and an intracellular kinase domain. Specifically, the *Tnt1* insertion situated on the TM domain is referred to as *lyk8-1*, whereas the insertion located on the kinase domain is identified as *lyk8-2*.

(B and C) Semi-quantitative RT-PCR analyses were conducted to assess the transcript levels of *LYK8*, *LYK6*, *LYK7*, and *LYK10* in both the wild-type and individual mutants of *M. truncatula*. *M. truncatula Histone 2A* was used as a loading control.

(D) Root colonization by *R. irregularis* was examined at 3-weeks post-inoculation (wpi) in both wild-type and various combinations of *cerk1* with distinct LysM receptor mutants. The extent of colonization is shown as a percentage of the total root length.

(E) Infection events were quantified within the roots of plants in panel (D).

(F) Confocal images of arbuscule structures in the wild-type and mutant. Bar = 10  $\mu$ m.

(G) Phylogenetic analysis of LYK-type proteins. A maximum likelihood phylogenetic tree was constructed using protein sequences of all LYK proteins from *M. truncatula* (Mt), *L. japonicus* (Lj), *S. lycopersicum* (Sl), *O. sativa* (Os), *Brachypodium distachyon* (Bd), *A. thaliana* (At), and *P. andersonii* (Pan). The LYK8 clade is highlighted in blue, while the CERK1 clade is shown in red.

(D and E) These experiments were repeated three times with similar results. Asterisks denote statistical significance as calculated by one-way ANOVA and Tukey's multiple comparison. (Mean  $\pm$  S.E.M., n = 10; ns, not significant).

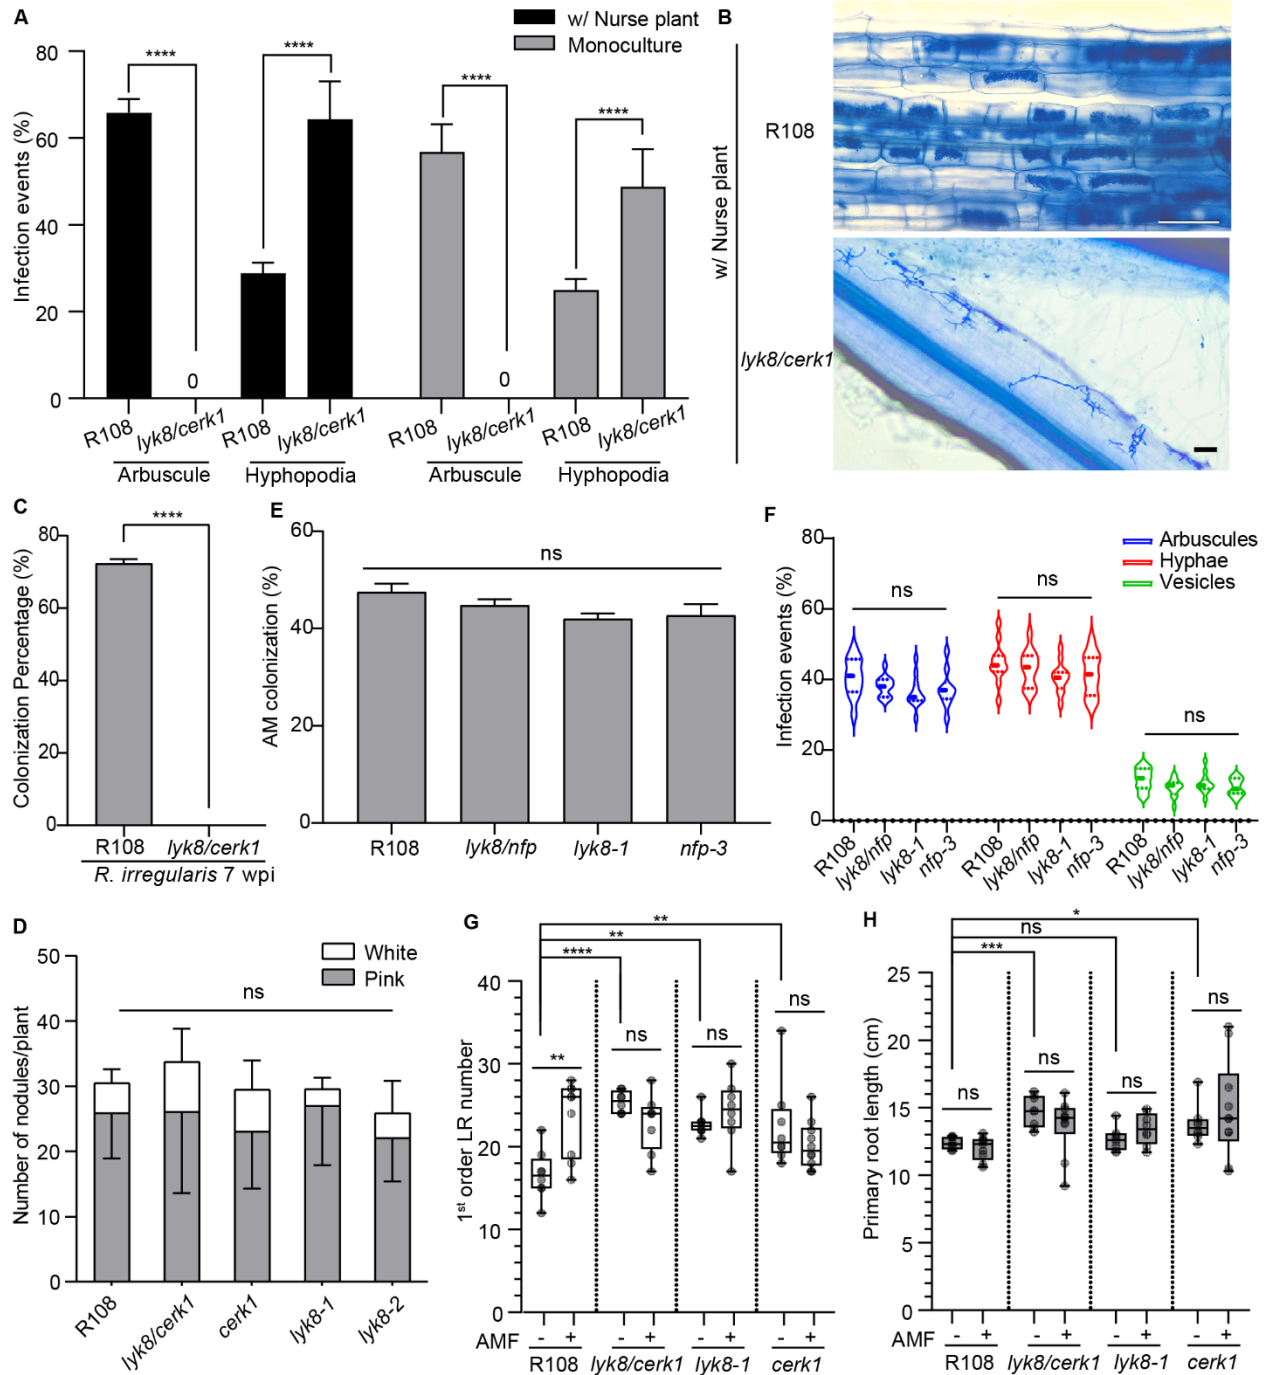

**Figure S2. The phenotype of wild-type and receptor mutants in mycorrhization, nodulation, and AMF-induced lateral root development. Related to Figure 1.**

(A) The roots of *lyk8/cerk1* plant lost the ability to form arbuscules even when co-cultured with wild-type plants. Arbuscules and hyphopodia were quantified in both wild-type and *lyk8/cerk1* mutants grown with or without wild-type nurse plants during the late infection stage (six weeks



after *R. irregularis* inoculation). Statistically significant differences were determined using Student's *t*-test. (Mean  $\pm$  S.E.M., n = 10).

(B) Images displaying ink-stained colonization of AMF in the roots of *M. truncatula* wild-type and mutant plants cultivated alongside nurse plants. Bar=100  $\mu$ m.

(C) Colonization of *R. irregularis* in wild-type and *lyk8/cerk1* mutant at 7 wpi.

(D) The nodulation phenotype of *M. truncatula* wild-type and various mutants was assessed upon inoculation with *E. meliloti* 1021. The count of white and pink nodules for each genotype was evaluated at three-weeks post-inoculation. Statistical significance was established through one-way ANOVA followed by Tukey's multiple comparison test. (Mean  $\pm$  S.E.M., n = 15; ns, not significant).

(E) The degree of colonization by *R. irregularis* was evaluated as a percentage of root length in wild-type R108, *lyk8-1*, *nfp-3*, and *lyk8/nfp* mutant plants at 3 wpi.

(F) The Violin plot illustrates different infection events in the plant roots as depicted above.

(G and H) The number of first-order lateral roots (G) and the length of the primary root (H) were measured in wild-type plants and *lyk8/cerk1*, *lyk8*, and *cerk1* mutants three weeks after inoculation with *R. irregularis*. Statistically significant differences between groups are determined by Student's *t*-test. (Mean  $\pm$  S.E.M., n = 8).

(D, E and F) These experiments were repeated three times with similar results. Asterisks denote statistical significance as calculated by one-way ANOVA and Tukey's multiple comparison. (Mean  $\pm$  S.E.M., n = 10; ns, not significant).

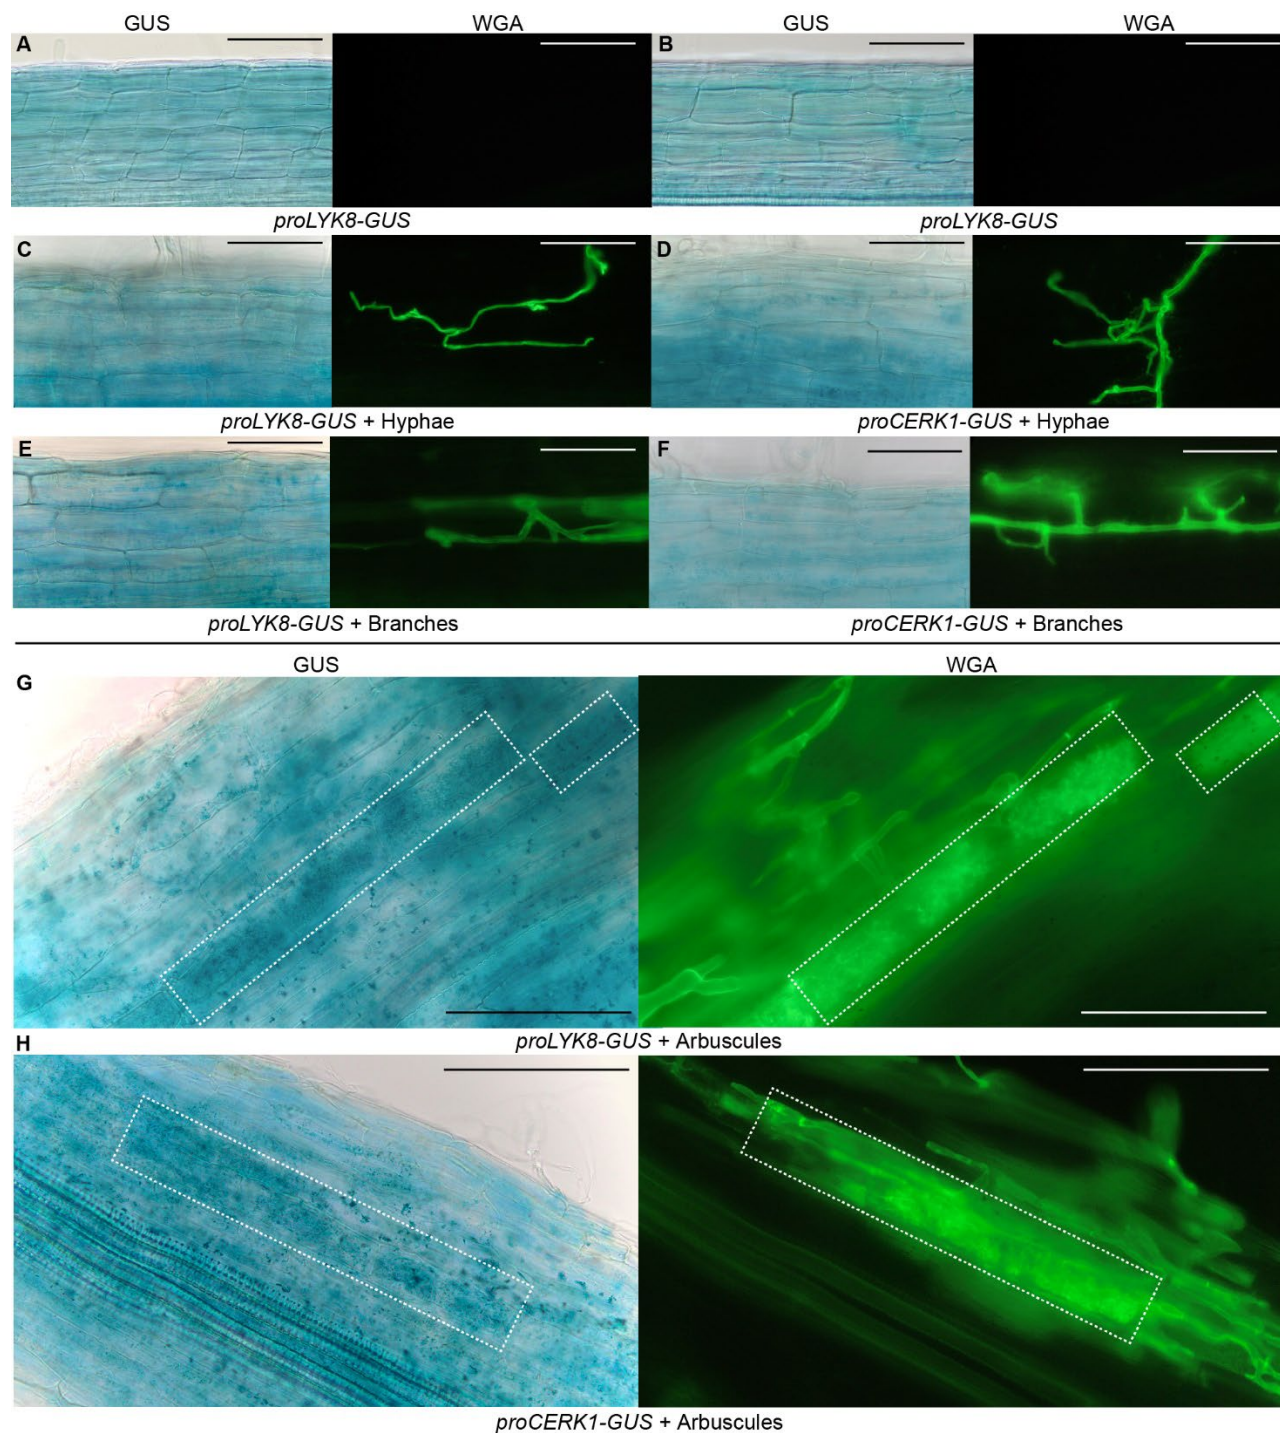

**Figure S3. The expression of *LYK8* and *CERK1* was slightly enhanced in arbuscule-containing cells at late stage of AMF infection. Related to Figure 1.**

(A-H) GUS and WGA staining were performed on the roots of *M. truncatula* wild-type plants transformed with promoter-GUS constructs to illustrate the expression patterns of *LYK8* and *CERK1* in the presence or absence of AMF. Bar = 150  $\mu$ m.

(A and B) The GUS activity of *LYK8* and *CERK1* promoters in the roots, in the absence of AMF, showed a ubiquitous expression pattern across all root cell layers.

(C-F) GUS activity was detected at the early stage of AMF infection, associated with hyphopodia formation (C and D), and hyphal branching inside root cells (E and F).

(G and H) GUS activity exhibited a slight enhancement in cells containing arbuscules, which are marked with white dashed rectangles.

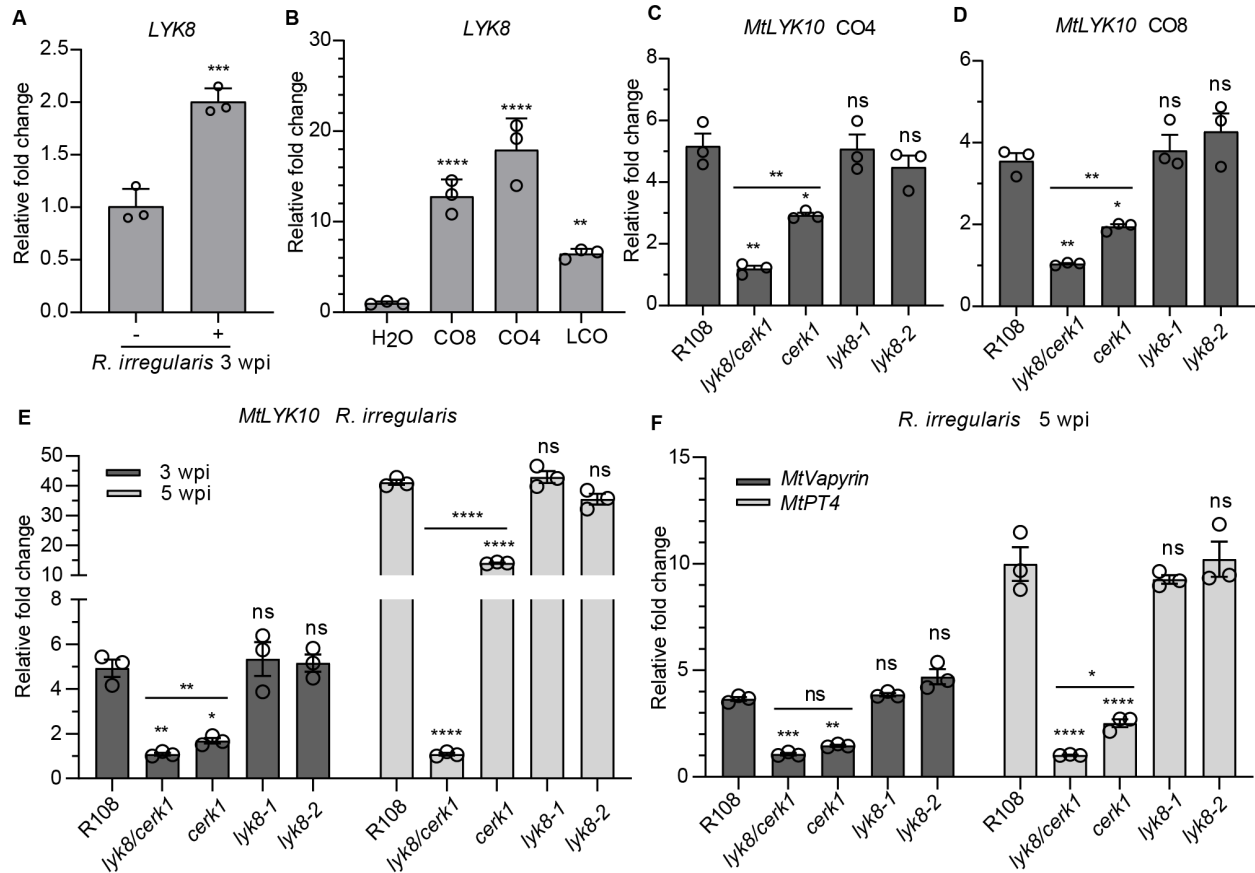

**Figure S4. *LYK8* can be induced by COs, LCO and AMF, and it regulates the expression of symbiotic genes in conjunction with *CERK1*. Related to Figure 2.**

(A) and (B) qRT-PCR analysis was conducted to assess the expression of *LYK8* in the roots of *M. truncatula* wild-type plants after treatments with *R. irregularis* (A) or  $10^{-8}$  M of CO4, CO8 and LCO (LCO produced by *E. meliloti* 1021) (B). Statistically significant differences in (A) were determined using Student's *t*-test. (Mean  $\pm$  S.E.M., n = 8).

(C-E) The qRT-PCR analysis examined the expression of the symbiotic marker gene, *MtLYK10*, in wild-type and different receptor mutants in response to CO4 (C), CO8 (D) treatment for 6 hours, as well as *R. irregularis* (E) treatment at 3 and 5 wpi.

(F) The expression of *MtVapyrin* and *MtD27* was evaluated in the roots of both wild-type and mutant plants following inoculation with *R. irregularis*.

(B-F) These results were based on three independent biological replicates. Asterisks denote statistical significance as calculated by one-way ANOVA and Tukey's multiple comparison. (Mean  $\pm$  S.E.M., n = 8).



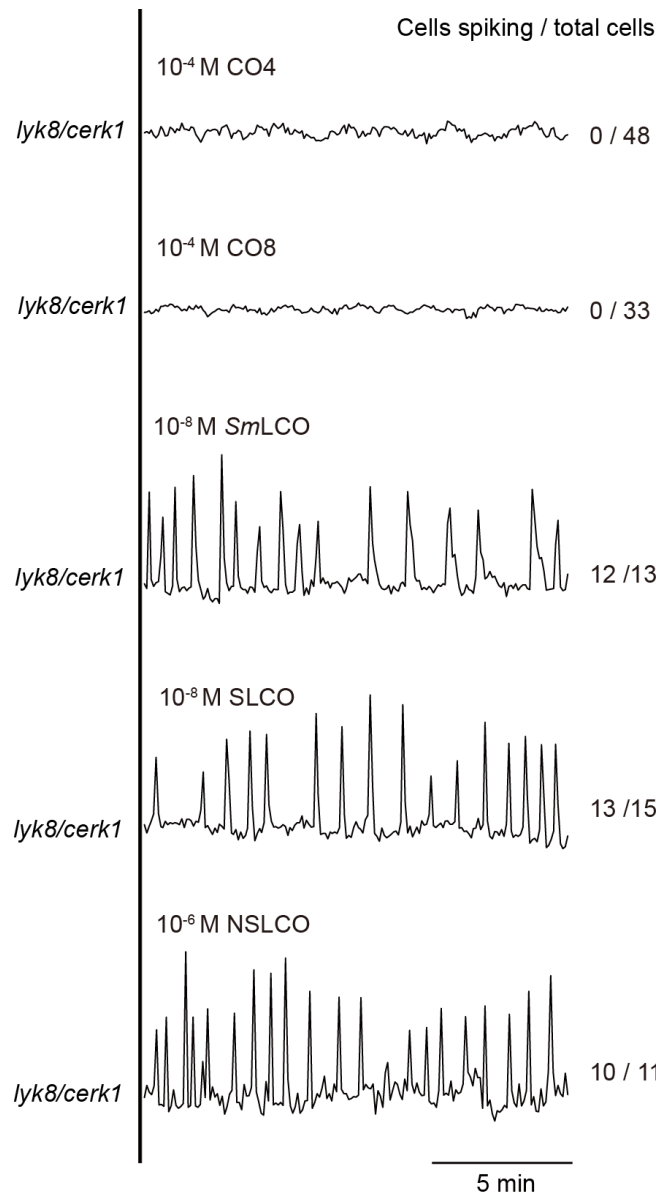

**Figure S5. CO but not LCO-triggered calcium oscillations were completely abolished in *lyk8/cerk1* mutant. Related to Figure 3.**

Representative calcium oscillations were captured in the atrichoblasts of lateral roots of *lyk8/cerk1*. These traces were recorded in roots responding to various concentrations of specific compounds: an exceptionally high concentration (10<sup>-4</sup> M) of both CO4 and CO8, as well as more physiological concentrations of *Em*LCO (LCO produced by *E. meliloti* 1021, 10<sup>-8</sup> M), S-LCO (sulfated LCO at 10<sup>-8</sup> M), and NS-LCO (non-sulfated LCO at 10<sup>-6</sup> M). These traces represent the ratio of YFP to CFP, expressed in arbitrary units. Annotations alongside each trace specify the count of responsive cells relative to the total number of cells assessed.

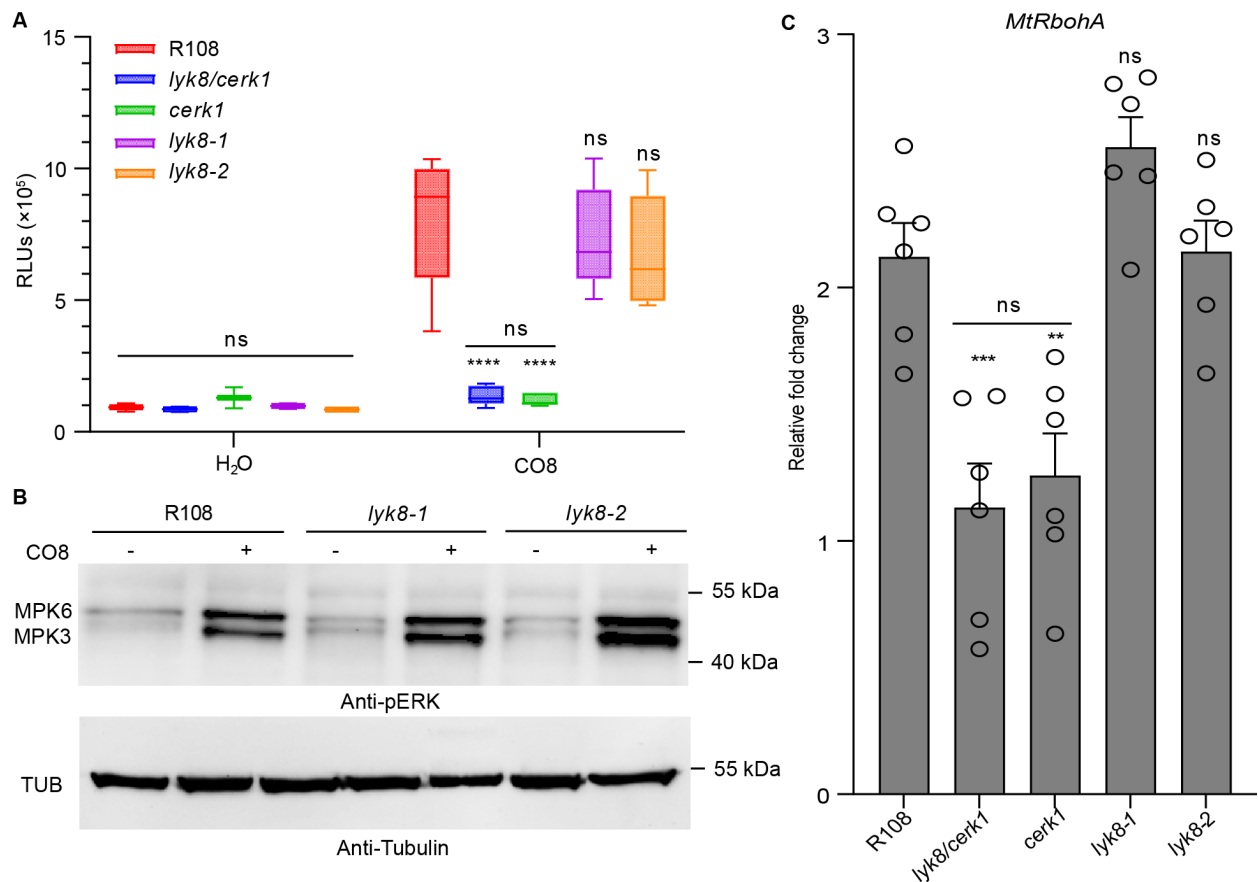

**Figure S6. *LYK8* does not play a role in CO8-triggered immune signaling.**

**Related to Figure 5.**

(A) *M. truncatula* roots of wild-type R108, *lyk8-1*, *cerk1*, and *lyk8/cerk1* were treated with or without  $10^{-6}$  M CO8 for ROS induction. ROS levels were quantified based on the average of the maximum relative luminescence units (RLUs) recorded in each curve from Figure 5A.

(B) MAPK activation in the roots of wild-type R108 as well as *lyk8-1* and *lyk8-2* mutants induced by  $10^{-6}$  M CO8 for 10 minutes. The phosphorylation bands were detected using an anti-pERK antibody. *M. truncatula* Tubulin protein was used as the loading control.

(C) The qRT-PCR analysis of the expression levels of the defense marker gene *MtRbohA* in the roots of wild-type and receptor mutants following treatment with  $10^{-7}$  M CO8.

(A and C) These experiments were independently replicated three times. Asterisks denote statistical significance as calculated by one-way ANOVA and Tukey's multiple comparison. (Mean  $\pm$  S.E.M., n = 8; ns, not significant).

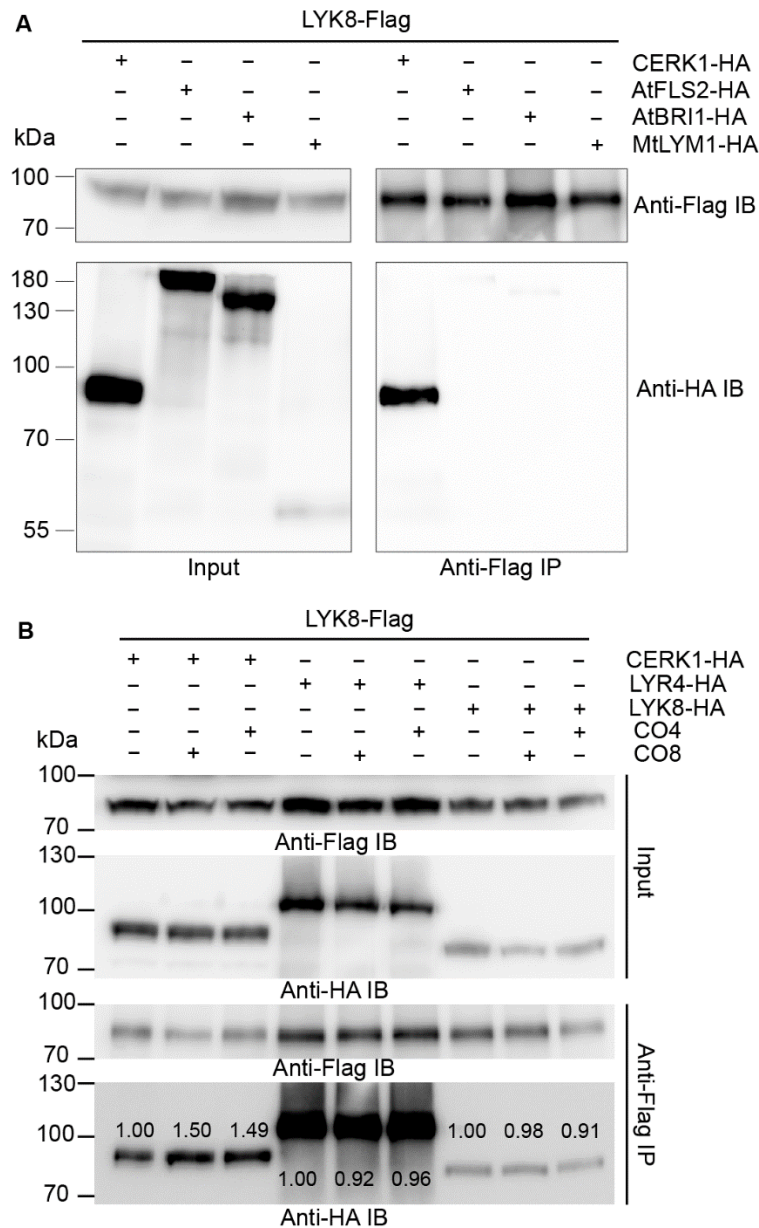

**Figure S7. CO treatment can promote interactions between LYK8 and CERK1, but not LYR4 and LYK8 itself. Related to Figure 7.**

(A and B) The indicated constructs were transiently expressed in *N. benthamiana* leaves, followed by Co-IP assays.

(A) LYK8 can specifically interact with CERK1 but not with other plasma membrane-localized proteins.

(B) LYK8 can interact with LYR4 and LYK8 independently of CO treatment. These interactions were not changed by pretreatment with  $10^{-6}$  M CO4 or CO8. The intensity of the bands for IP samples was quantified by ImageJ.

| Gene                                        | Gene ID       | Primer sequence (5' → 3')                                                |
|---------------------------------------------|---------------|--------------------------------------------------------------------------|
| <b>For mutants genotyping</b>               |               |                                                                          |
| <i>lyk6</i>                                 | Medtr5g086040 | F: GTCTTATCTTCTTTCTTACA<br>R: TGGCTGAAGTCATAGAGAA                        |
| <i>lyk7</i>                                 | Medtr5g086030 | F: CATCTAAATTAATCGGAGTT<br>R: CAACTCAGCATCAATTTTCAG                      |
| <i>lyk8-1</i>                               | Medtr2g024290 | F: GCAGATGAAAATGGAACTTTC<br>R: CAATTGTGTAAGTATTTAGGA                     |
| <i>lyk8-2</i>                               | Medtr2g024290 | F: GGTATACTATGCCGAGCTACG<br>R: TGATGCAAGCAGCATTCTAAG                     |
| <i>cerk1</i>                                | Medtr3g080050 | F: ATGGAACATCAACCCAGATTCACCT<br>R: CTTTTCCCGGAACAAAACAATGC               |
| <i>lyk10</i>                                | Medtr5g033490 | F: GTCACCACTTTACCATGGAAAAG<br>R: CACAGATTCTGGTGGAAAGGTAG                 |
| <i>nfp</i>                                  | Medtr5g019040 | F: ATGTCTGCCTTCTTTCTTCCTTC<br>R: ACGAGCTATTACAGAAGTAACAAC                |
| <i>Tnt1</i>                                 | N/A           | F: TCCTTGTTGGATTGGTAGCC<br>R: CAGTGAACGAGCAGAACCTGTG                     |
| <b>For qPCR analysis</b>                    |               |                                                                          |
| <i>LYK8</i>                                 | Medtr2g024290 | F: TACCAGGAGCATCTGAACT<br>R: TACCTGTCAACCTTGGAGAAAC                      |
| <i>MtLYK10</i>                              | Medtr5g033490 | F: AGAAGCTACGAGCCAAGGTAGC<br>R: AGGTAGCCTGGTGTCCAACAAG                   |
| <i>MtRbohA</i>                              | Medtr1g083290 | F: TTCGAACCTTTGGGCGATTGGAC<br>R: ATTCGTAGCCTTGGCATCCTTGG                 |
| <i>MtPR10</i>                               | Medtr5g033490 | F: GGCTCAAATGGAGGGTCTATTG<br>R: GCTTTGCCTTCCTCAACCT                      |
| <i>MtChitinase</i>                          | Medtr2g099470 | F: GGCTGACATCCTTACACAAGA<br>R: AGAATTGAGGGCATCGAGAAA                     |
| <i>MtVapyrin</i>                            | Medtr6g027840 | F: GCCAGTTGCATTTAGGATTCA<br>R: GCACCTGGAGCAAGAACACT                      |
| <i>MtD27</i>                                | Medtr1g471050 | F: AGTTCTTGCAAGGCCTACAGATG<br>R: TGATTCTGTTGCTGCTTGAACAC                 |
| <i>MtPT4</i>                                | Medtr1g028600 | F: GACACGAGGCGCTTTCATAGCAGC<br>R: GTCATCGCAGCTGGAACAGCACCG               |
| <i>MtUbiquitin</i>                          | Medtr4g088485 | F: AACTTGTTGCATGGGTCTTGA<br>R: CATTAAGTTTGACAAAGAGAAAGAGACAGA            |
| <i>FOW1</i>                                 | AB078975      | F: GGTATCCTTGGTGGTGTCTCC<br>R: CTACCCCAGTTGGTCATCAGT                     |
| <b>For plasmid construction</b>             |               |                                                                          |
| <i>pro35s-LYK8ect-NFP<sub>mic</sub>-YFP</i> |               | F: GGTCTCACAAAATGATCACAAATCAAATTTTCA<br>R: GGTCTCGTAAGGCCTCCTTTGGACATTCC |

**Table S1. Primers used in this work. Related to STAR Methods**



| <b>Protein</b> | <b>Species</b>                                   | <b>NCBI accession number</b> |
|----------------|--------------------------------------------------|------------------------------|
| LYK1           | <i>Medicago truncatula</i> (Mt)                  | AAQ73154                     |
| LYK2           |                                                  | CAN88845                     |
| LYK3           |                                                  | Q6UD73                       |
| LYK4           |                                                  | AES99915                     |
| LYK5           |                                                  | AES99912                     |
| LYK6           |                                                  | Q6UD75                       |
| LYK7           |                                                  | AAQ73158                     |
| LYK8           |                                                  | XP_013462891                 |
| CERK1          |                                                  | XP_003601376                 |
| LYK10          |                                                  | XP_003613165                 |
| LYK11          |                                                  | XP_003627045                 |
| NFR1           | <i>Lotus japonicus</i> (Lj)                      | CAE02590                     |
| Lys1           |                                                  | BAI79267                     |
| Lys2           |                                                  | BAI79268                     |
| EPR3           |                                                  | BAI79269                     |
| Lys4           |                                                  | BAI79271                     |
| Lys5           |                                                  | BAI79272                     |
| CERK6          |                                                  | BAI79273                     |
| Lys7           |                                                  | BAI79274                     |
| Lys8           | Not registered,<br>Gene ID: LotjaGi4g1v0157000.1 |                              |
| LYK1           | <i>Solanum lycopersicum</i> (Sl)                 | NP_001233773                 |
| LYK3           |                                                  | XP_010318399                 |
| LYK11          |                                                  | NP_001234719                 |
| LYK12          |                                                  | NP_001234725                 |
| LYK13          |                                                  | NP_001234730                 |
| LYK14          |                                                  | XP_019069864                 |
| LYK1           | <i>Oryza sativa</i> (Os)                         | XP_015628733                 |
| LYK4           |                                                  | XP_015633426                 |
| CERK1          |                                                  | XP_015650771                 |
| CERK2          |                                                  | BAJ09794                     |
| LYK1           | <i>Brachypodium distachyon</i> (Bd)              | XP_010235348                 |
| LYK3           |                                                  | XP_010233416                 |
| LYK4           |                                                  | XP_003567102                 |
| CERK1          | <i>Arabidopsis thaliana</i> (At)                 | NP_566689                    |
| LYK3           |                                                  | NP_175606                    |
| LYK1           | <i>Parasponia andersonii</i> (Pan)               | PON52141.1                   |
| LYK3.1         |                                                  | PON42545.1                   |
| LYK3.2         |                                                  | PON42546.1                   |
| LYK4           |                                                  | PON54359.1                   |

**Table S2. Protein IDs used in the phylogenetic study. Related to STAR Methods**
